# Supplementary material for: Association of low birth weight with thinness and severe obesity in children aged 3–12 years: a large-scale population-based cross-sectional study in Shanghai, China
Source: PubMed Central journal article supplement — BMJ Open. 2019 May 30;9(5):e028738. doi: 10.1136/bmjopen-2018-028738 (PMC6549709; doi:10.1136/bmjopen-2018-028738), 2019-05-30
Supplement: bmjopen-2018-028738.draft_revisions.pdf [file bmjopen-2018-028738.draft_revisions.pdf]

# BMJ Open

BMJ Open is committed to open peer review. As part of this commitment we make the peer review history of every article we publish publicly available.

When an article is published we post the peer reviewers' comments and the authors' responses online. We also post the versions of the paper that were used during peer review. These are the versions that the peer review comments apply to.

The versions of the paper that follow are the versions that were submitted during the peer review process. They are not the versions of record or the final published versions. They should not be cited or distributed as the published version of this manuscript.

BMJ Open is an open access journal and the full, final, typeset and author-corrected version of record of the manuscript is available on our site with no access controls, subscription charges or pay-per-view fees (<http://bmjopen.bmj.com>).

If you have any questions on BMJ Open's open peer review process please email [info.bmjopen@bmj.com](mailto:info.bmjopen@bmj.com)

# BMJ Open

## Relationship between Low Birthweight and Thinness, Severe Obesity in 3 to 12-Year-Old Shanghai Children: A large-scale population-based study

|                               |                                                                                                                                                                                                                                                                                                                                                                                                                                                                                                                                                                                                                                                                                                                                                                                                                                                                          |
|-------------------------------|--------------------------------------------------------------------------------------------------------------------------------------------------------------------------------------------------------------------------------------------------------------------------------------------------------------------------------------------------------------------------------------------------------------------------------------------------------------------------------------------------------------------------------------------------------------------------------------------------------------------------------------------------------------------------------------------------------------------------------------------------------------------------------------------------------------------------------------------------------------------------|
| Journal:                      | <i>BMJ Open</i>                                                                                                                                                                                                                                                                                                                                                                                                                                                                                                                                                                                                                                                                                                                                                                                                                                                          |
| Manuscript ID                 | bmjopen-2018-028738                                                                                                                                                                                                                                                                                                                                                                                                                                                                                                                                                                                                                                                                                                                                                                                                                                                      |
| Article Type:                 | Research                                                                                                                                                                                                                                                                                                                                                                                                                                                                                                                                                                                                                                                                                                                                                                                                                                                                 |
| Date Submitted by the Author: | 21-Dec-2018                                                                                                                                                                                                                                                                                                                                                                                                                                                                                                                                                                                                                                                                                                                                                                                                                                                              |
| Complete List of Authors:     | Chen, Chang; Shanghai Childrens Medical Center Affiliated to Shanghai Jiaotong University School of Medicine, Pediatric Translational Medicine Institute; Shanghai Jiaotong University School of Medicine, School of Public Health<br>Jin, Zhijuan; Shanghai Childrens Medical Center Affiliated to Shanghai Jiaotong University School of Medicine<br>Yang, You; Shanghai Childrens Medical Center Affiliated to Shanghai Jiaotong University School of Medicine<br>Jiang, Fan; Shanghai Children's Medical Center<br>Huang, Hong; Shanghai Jiaotong University School of Medicine Xinhua Hospital, Key Laboratory of Children's Environmental Health<br>Liu, Shijian; Shanghai Children's Medical Center, Pediatric Translational Medicine Institute<br>Jin, Xingming; Shanghai Childrens Medical Center Affiliated to Shanghai Jiaotong University School of Medicine |
| Keywords:                     | Birthweight, Obesity, Thinness, Children                                                                                                                                                                                                                                                                                                                                                                                                                                                                                                                                                                                                                                                                                                                                                                                                                                 |
|                               |                                                                                                                                                                                                                                                                                                                                                                                                                                                                                                                                                                                                                                                                                                                                                                                                                                                                          |

SCHOLARONE™  
Manuscripts

1  
2  
3 **Relationship between Low Birthweight and Thinness, Severe Obesity in 3 to**  
4 **12-Year-Old Shanghai Children: A large-scale population-based study**  
5  
6  
7

8 Chang Chen,<sup>1,3</sup> Zhijuan Jin,<sup>2,3</sup> You Yang,<sup>2</sup> Fan Jiang,<sup>2,3</sup> Hong Huang,<sup>3\*</sup> Shijian Liu,<sup>1,3\*</sup>  
9 Xingming Jin<sup>2</sup>  
10  
11

12  
13 <sup>a</sup> *Department of Clinical Epidemiology, Pediatric Translational Medicine Institute, Shanghai*  
14 *Children's Medical Center and School of Public Health, Shanghai Jiaotong University,*  
15 *Shanghai School of Medicine, People's Republic of China*  
16  
17

18 <sup>b</sup> *Department of Developmental and Behavioral Paediatrics, Shanghai Children's Medical*  
19 *Center, School of Medicine, Shanghai Jiaotong University, Shanghai, People's Republic of*  
20 *China*  
21  
22

23 <sup>c</sup> *Shanghai Key Laboratory of Children's Environmental Health, Xinhua Hospital, School of*  
24 *Medicine, Shanghai Jiaotong University, Shanghai, People's Republic of China*  
25  
26

27 **Keywords:** Severe Obesity, Thinness, low Birthweight, Children  
28  
29

30 **Running title:** Relationship between Low Birthweight and Obesity  
31  
32

33  
34 **\*Corresponding author.** Shijian Liu, 1678 Dongfang Road, Pediatric Translational  
35 Medicine Institute, Shanghai Children's Medical Center, Shanghai Jiaotong University  
36 School of Medicine, Shanghai, China, 200127, Tel and Fax: 86-21-38625637  
37  
38 E-mail: liushijian@scmc.com.cn  
39  
40

41  
42  
43 **Co-corresponding author.** Hong Huang, 1665 Kongjiang Road, Shanghai Key Laboratory  
44 of Children's Environmental Health, Xinhua Hospital, Shanghai Jiaotong University School  
45 of Medicine, Shanghai, China, 200092  
46  
47

48 E-mail: Huanghong@smhb.gov.cn  
49  
50  
51  
52  
53  
54  
55  
56  
57  
58  
59  
60

## ABSTRACT

**Objectives:** Low birthweight (BW) is a general symbol of inadequate intrauterine conditions that elicit abnormal fetal growth and development. The aim of current study is to investigate the relationship between low BW and thinness or severe obesity during maturation.

**Design:** A large-scale cross-sectional population-based survey.

**Setting:** 134 kindergartens and 70 elementary schools.

**Participants:** 70,284 Chinese children aged 3-12 years.

**Primary and secondary outcome measures:** International Obesity Task Force BMI cut-offs were used to define grade 1, 2, 3 thinness, overweight, obesity and severe obesity. Logistic regression was used to estimate the association.

**Results:** Total 70,284 children participated in the survey. The percentage of grade 1 thinness and severe obesity in children with low birthweight is significantly higher than that with normal birthweight ( $P < 0.05$ ). Low BW correlated with an increased risk of grade 1 thinness (OR = 1.56, 95%CI = 1.38–1.75), grade 2 thinness (OR = 1.34, 95%CI = 1.10–1.64), grade 3 thinness (OR = 1.99, 95%CI = 1.63–2.42) and severe obesity (OR = 1.27, 95%CI = 1.03–1.55) but did not correlate with overweight.

**Conclusions:** The relationship between low BW and thinness or severe obesity risk is associated.

### Strengths and limitations of this study:

- This study is a large population-based cross-sectional survey, with a representative, multistage proportional cluster sampling.
- Low birthweight was found to be correlated with an increased risk of grade 1 thinness, grade 2 thinness, grade 3 thinness and severe obesity, rather than overweight or obesity.
- Longitudinal studies are still needed to making cause-and-effect inferences and observing continuous age-effects and long-term effects.

## INTRODUCTION

Childhood obesity is one of the most serious global public health challenges.<sup>1</sup> Furthermore, obesity in childhood may lead to short-term morbidity and to subsequent adverse consequences across the individual's lifespan and his or her subsequent generation.<sup>1</sup> Growing evidence indicates that perinatal characteristics have been recognized as contributing factors to the obesity epidemic.<sup>2</sup> Birthweight (BW) is frequently used as an indicator of the conditions experienced in utero which contribute to the newborn baby's survival, health, growth, and development.<sup>3 4</sup> Lower BW is a general symbol of inadequate intrauterine conditions that elicit abnormal fetal growth and development.<sup>5</sup> Based on the findings of numerous studies, low BW (birthweight < 2500g) has been shown to trigger various short-term and long-term health issues, especially for birth injuries, delayed motor development, delayed cognitive and social skills, obesity and chronic diseases.<sup>4 6</sup>

A great number of studies have indicated that high BW is associated with an increased risk of childhood obesity.<sup>6-9</sup> Nevertheless, the conclusions drawn by studies evaluating the associations between low BW and obesity appear to be controversial. Some studies suggest that low BW correlates with a significantly elevated risk for obesity.<sup>10 11</sup> while some other studies contradict this result, reporting that low BW is unrelated to or protective against overweight and/or obesity.<sup>6 12 13</sup> However, these studies only assess the effect of BW on childhood overweight or obesity but ignored childhood thinness.

Because of the absence of evidence regarding the relationship between BW and thinness and the inconsistent conclusions regarding the relationship of BW and overweight or obesity, in our large population-based observational study, we aimed to examine the relationship between BW and the risk of obesity and placed extra emphasis on the effect of thinness in 3–12-year-old children from 7 districts of Shanghai.

## METHODS

### Study design and quality control

Our study was a school-based cross-sectional population study and was part of a

1  
2  
3  
4 governmental population survey of autism spectrum disorders. Multistage, stratified clustered  
5 random sampling was conducted in 3 to 12-year-old children in Shanghai, China and related  
6 baseline data was collected from 134 kindergartens and 70 elementary schools in June 2014.  
7  
8 Details of the sampling and quality control process have been described previously.<sup>14</sup> The 17  
9  
10 districts of Shanghai were stratified into eight urban districts in the central area and nine  
11  
12 suburban areas, according to the geographical and social population distributions; people  
13  
14 living in urban and suburban districts were defined as urban and suburban residents. EpiData  
15  
16 3.1 (EpiData Association, Odense, Denmark) was used for data inputting and a logical error  
17  
18 check was applied. We also repeated data entry by randomly sampling 15% of the  
19  
20 questionnaires to ensure consistency. The study was approved by the Institutional Review  
21  
22 Boards of the Shanghai Municipal Commission of Health and Family Planning.  
23  
24  
25  
26  
27

## 28 **Measurements**

29  
30 We used growth questionnaires for collecting information about children's families and  
31  
32 social environments. Teachers distributed questionnaires to students, asked students to take  
33  
34 the questionnaire home and have their parents fill in the information, then the teachers  
35  
36 collected the completed questionnaires and returned them to the investigator. Parents  
37  
38 provided the following information about their children: age, sex, weight, height, birthweight,  
39  
40 education level, and so on by self-report. Participants with complete birthweight, weight and  
41  
42 height data constituted the final sample. BMI was calculated as weight divided by the square  
43  
44 of height ( $\text{kg}/\text{m}^2$ ) and classified as grade 3 thinness, grade 2 thinness, grade 1 thinness,  
45  
46 overweight, obesity and severe obesity, according to the International Obesity Task Force  
47  
48 age- and sex-specific cut-off points, of which BMI cut-offs equal to 16.0, 17.0, 18.5, 25.0,  
49  
50 30.0 and 35.0  $\text{kg}/\text{m}^2$  at age 18 years, respectively.<sup>15</sup>  
51

52  
53 Birthweight, was divided into low BW group (neonates weighing  $< 2500$  g at birth,  
54  
55 irrespective of gestational age), normal BW group (neonates weighing: 2500–4000 g at birth,  
56  
57 irrespective of gestational age) and high BW group (neonates weighing  $\geq 4000$ g at birth,  
58  
59 irrespective of gestational age).  
60

1  
2  
3  
4 Neonatal characteristics including gestational weeks (< 37 weeks, 37–42 weeks and  $\geq 42$   
5 weeks), normal delivery (yes or no), single-child family (yes or no), maternal history of  
6 abortion (yes or no), asphyxia (lack of oxygen at birth, yes or no), and infant feeding patterns  
7 (breast feeding exclusively, formula feeding exclusively, mixed feeding) were considered as  
8 potential prenatal confounding factors.<sup>6 16</sup> Moreover, parental socioeconomic characteristics  
9 were considered as follows: family income was divided into three categories (low: < 50,000  
10 Chinese Yuan per year; middle: 50,000–200,000 Chinese Yuan per year; high:  $\geq 200,000$   
11 Chinese Yuan per year) according to the definitions of social science,<sup>17</sup> parental education  
12 (low: illiterate, primary school and junior school; middle: high school, technical school and  
13 college; high: undergraduate, master and doctor), and residence location (urban districts:  
14 Yangpu, Xuhui, and Jing'an; suburban districts: Minhang, Pudong, Fengxian and  
15 Chongming).

### 30 **Statistical analysis**

31  
32 Continuous variables were presented as the mean with standard deviations (SD) and a  
33 Student's *t*-test was carried out for group comparisons. Categorical variables were presented  
34 as absolute numbers with relative frequencies (%) and inter-subgroup differences were  
35 examined using Pearson Chi-square ( $\chi^2$ ) test. Multivariable logistic regression was used to  
36 estimate the relationship between BW and the risk of childhood thinness and obesity with  
37 normal weight as a reference group. Odds ratio (OR) and 95% confident interval (CI) were  
38 obtained by using the multiple models. All statistical analyses were performed with IBM  
39 SPSS Statistics Version 22 (SPSS, Chicago, IL, USA). The criterion for statistical  
40 significance was 0.05 by two-tailed.

## 52 **RESULTS**

53  
54 In total, 84,075 questionnaires were distributed and 81,384 completed questionnaires were  
55 returned with a response rate of 96.80%. Complete data regarding weight, height, and BW  
56 were available for 70,284 children. 3,359 children were born with low BW and 59,356  
57  
58  
59  
60

1  
2  
3  
4 children were born with normal BW. 32,629 boys (52.03%) and 30,086 girls (47.97%) aged 3  
5  
6 to 12 years. Sex-specific variables such as growth (age, BMI category, and BW), neonatal  
7  
8 characteristics (pregnancy term, breast-feeding, normal delivery, children number, abortion  
9  
10 and asphyxia) and parental socioeconomic characteristics (residence, family income and  
11  
12 parental education) were described in detail in **Table 1**.

13  
14 The distribution of different BMI categories between low and normal BW was shown in  
15  
16 **Figures 1**. For boys, the respective percentage of grade 3 thinness (3.64% vs. 2.23%,  $P <$   
17  
18 0.05), grade 2 thinness (3.64% vs. 2.83%,  $P <$  0.05), grade 1 thinness (12.95% vs. 9.00%,  $P <$   
19  
20 0.05) were higher in the low BW group than those in the normal BW group; in contrast, the  
21  
22 respective percentage of overweight (14.00% vs. 16.34%,  $P >$  0.05), obesity (4.75% vs.  
23  
24 5.22%,  $P >$  0.05) were lower but severe obesity (5.86% vs. 4.36%,  $P <$  0.05) was higher in  
25  
26 low BW group compared with normal group ( $p <$  0.05). Meanwhile, the percentage of severe  
27  
28 obesity and grade 3 thinness were relatively higher in low BW group compared with the  
29  
30 normal BW group ( $P <$  0.05), which shows a U-shape. The pattern is similar in girls;  
31  
32 however in boys the percentage of grade 3 thinness (3.64% vs. 5.81%,  $P <$  0.05), grade 2  
33  
34 thinness (3.64% vs. 4.78%,  $P >$  0.05), grade 1 thinness (12.95% vs. 14.85%,  $P >$  0.05) were  
35  
36 higher but overweight (14.00% vs. 8.92%,  $P <$  0.05), obesity (4.75% vs. 2.82%,  $P <$  0.05) and  
37  
38 severe obesity (5.86% vs. 4.66%,  $P >$  0.05) were lower than that in girls in low BW group.  
39

40  
41 Multivariable logistic regression was used to further determine the relationship between  
42  
43 BW and thinness, overweight and obesity after adjusting for potential confounders. As is  
44  
45 shown in **Table 2**, an initial analysis was performed in model 1 adjusting for only age and  
46  
47 gender variables. The results showed that low BW is significantly correlated with a higher  
48  
49 risk for both thinness (grade 3 thinness: OR = 2.16, 95%CI = 1.82–2.56; grade 2 thinness:  
50  
51 OR = 1.43, 95%CI = 1.20–1.70; grade 1 thinness: OR = 1.49, 95%CI = 1.34–1.65) and  
52  
53 severe obesity (OR = 1.62, 95%CI: 1.38–1.90). In addition, model 2 is further adjusted for  
54  
55 neonatal characteristics based on model 1 and model 3 characterized by additional  
56  
57 adjustments for socioeconomic variables based on model 2. Still, low BW children are more  
58  
59 likely to have grade 1 thinness (OR = 1.56, 95%CI = 1.38–1.75), grade 2 thinness (OR = 1.34,  
60



95%CI = 1.10–1.64) and especially grade 3 thinness (OR = 1.99, 95%CI = 1.63–2.42); the pattern is consistent in the three models. The low BW remained to be statistically significant predictors of severe obesity (OR = 1.27, 95%CI = 1.03–1.55).

## DISCUSSION

In the present study, we reported a bidirectional effect of low BW, increasing the risk of grade 3 thinness and severe obesity.

Some studies have assessed the relationship between low BW and the risk of childhood obesity, but the results were controversial.<sup>6 18-22</sup> In a systematic review and meta-analysis involving eleven studies, pooled estimates for low BW (< 2500g) revealed no correlation with obesity (pooled OR = 0.87, 95%CI = 0.69–1.08) using normal BW (2500–4000 g) as the reference category.<sup>6</sup> Another systematic review and meta-analysis of 30 studies found that low BW was correlated with a reduced risk of childhood obesity (pooled OR = 0.67, 95%CI = 0.59–0.76).<sup>18</sup> With regard to long-term risk of overweight and obesity, two previous papers have suggested a positive correlation with low BW, including a population-based cross-sectional survey among Chinese adults (obesity: OR = 1.99, 95%CI = 1.15–3.43),<sup>11</sup> and an observational study among older women in Sweden (obesity: OR = 1.14, 95%CI = 1.03–1.26).<sup>10</sup> On the contrary, a large full-range BW study reported that children with a BW less than 2,500 g were protected against overweight or obesity from 6 months to 3 years of life, but this correlation disappeared among boys at 2 years of age.<sup>20</sup> Our study highlighted the correlation between low BW and increased risk of severe obesity rather than overweight or obesity among the Chinese children aged between 3 and 12 years. An age-specific effect of low BW on obesity might address some of the primary reasons why previous studies have drawn contrasting conclusions. Another possible explanation was small sample size and low prevalence of obesity in low BW children, which might limit the statistical power in the analyses of associations between low BW and the risk of childhood obesity.<sup>23</sup>

It was difficult to explain the particular pattern between grade 1, 2 and 3 thinness, and various BW groups. In a follow up study in 2 rural Shaanxi counties of Northwest China, low

1  
2  
3  
4 BW was not related with boys' obesity or thinness rates (adjusted OR = 2.91, 95% CI=  
5 0.95–8.93) but significantly correlated with increased risk of thinness among girls (adjusted  
6 OR = 4.41, 95% CI= 1.77–10.97).<sup>24</sup> Our study confirmed the correlation and further  
7 demonstrated that low BW is correlated with an increased risk of subsequent grade 3 thinness,  
8 followed by grade 1 thinness, and then grade 2 thinness after adjusting for confounding  
9 variables. On the other hand, high BW exerted a protective effect on grade 2 thinness,  
10 followed by grade 1 thinness, then grade 3 thinness. Most notably, low BW was a risk factor  
11 for grade 3 thinness as well as severe obesity. We hypothesized that the relationship between  
12 BW and thinness, overweight or obesity risk was not directly linear, whereas the relationship  
13 between low BW and BMI was U-shaped. Low BW was an adverse perinatal environment  
14 factor which predicts changes to the central regulatory mechanism linked with negative  
15 influences on metabolism and BMI.<sup>25</sup> Thus, children with low BW accompanied by poor  
16 childhood weight outcomes should receive more public health attention.  
17  
18  
19  
20  
21  
22  
23  
24  
25  
26  
27  
28  
29

30 Several studies have indicated that abnormal BW was an important risk factor for  
31 metabolic disease occurrence, especially for hypertension, type 2 diabetes, abdominal obesity  
32 and other chronic diseases later in life,<sup>11 26-28</sup> A proposed explanation for the relationship  
33 between BW and postnatal growth was through the concept of 'Developmental Origins of  
34 Health and Disease', which stated that environmental cues during critical periods of life lead  
35 to predictive adaptive responses that shaped tissue development and metabolic pathways,  
36 thereby permanently affecting long-term health and disease risk.<sup>29</sup> Our epidemiological  
37 observations might have implications for understanding intrauterine environmental influences  
38 during early development and the relationship of BW with later risk of thinness and obesity.  
39  
40  
41  
42  
43  
44  
45  
46  
47  
48  
49  
50

### 51 **Strengths and Limitations**

52 Our study recruited children from low- to high-income families across seven districts of  
53 the Shanghai area by a large, representative, multistage proportional cluster sampling. We  
54 were able to assess the relationship between low BW and risk of childhood thinness, obesity  
55 or severe obesity using a large sample size (n = 70,284) of children with low BW (4.61%).  
56  
57  
58  
59  
60

1  
2  
3  
4 What's more, we provided a comprehensive profile of the distribution of overall BMI status  
5 including grade 1, grade 2, grade 3 thinness, normal weight, overweight, obesity and severe  
6 obesity in low and normal BW groups. As for the potential confounding variables corrected  
7 in the multivariable logistic regression, we took a broad range of predictors into consideration,  
8 from prenatal to postnatal.  
9  
10  
11  
12

13  
14 However, there were several limitations in our study. First, the cross-sectional nature  
15 precluded us from making cause-and-effect inferences and observing continuous age-effects  
16 and long-term effects. Second, the information, including height and weight was collected by  
17 questionnaires because of the large sample size, and there was underlying bias of  
18 self-reported data. In addition, the BW records might have been wrongly recalled by the  
19 parents or guardian, thus the degree and direction of potential bias in the results was  
20 unknown. More accurate physical examination would be conducted in future studies.  
21  
22  
23  
24  
25  
26  
27  
28

## 29 **CONCLUSIONS**

30  
31  
32 In summary, low BW was positively correlated with an increased risk of thinness and  
33 severe obesity but not correlated with overweight or obesity. We call for special attention for  
34 children with abnormal BW for healthier physical development during growth. We hope the  
35 pattern of thinness and obesity in different BW groups may provide valuable insights to  
36 direct healthcare policies for improving outcomes and quality in later life.  
37  
38  
39  
40  
41  
42  
43  
44

## 45 **Authors' contributions**

46 ZJ, YY, FJ and XJ helped perform the study. XJ and SL designed the research; CC drafted  
47 the manuscript and performed statistical analyses; SL contributed to the interpretation of  
48 results and critically reviewed the manuscript; SL had primary responsibility for final content.  
49 All authors read and approved the final manuscript and declared no conflict of interest. We  
50 are grateful to all parents and teachers of the children for their assistance and cooperation in  
51 this study.  
52  
53  
54  
55  
56  
57

## 58 **Conflicts of interests**

1  
2  
3  
4 The authors declare no conflict of interest.

5  
6 **Ethics approval and consent to participate**

7  
8 This study was conducted according to the guidelines in the World Medical Association  
9  
10 (2000) Declaration of Helsinki: Ethical Principles for Medical Research Involving Human  
11  
12 Subjects (<http://www.wma.net/en/30publications/10policies/b3/>) and the Guidelines for the  
13  
14 Ethical Conduct of Medical Research Involving Children, revised in 2000 by the Royal  
15  
16 College of Paediatrics and Child Health: Ethics Advisory Committee (Arch Dis Child 2000,  
17  
18 82, 177–182). All procedures involving human subjects were approved by the Institutional  
19  
20 Review Boards of the Shanghai Municipal Commission of Health and Family Planning.  
21  
22 Verbal informed consent was obtained from all participants, and witnessed and formally  
23  
24 recorded. Parents were given notification and information about the survey at the beginning  
25  
26 of the questionnaire, it is difficult to get written consent in large scale population-based  
27  
28 cross-sectional study in China.

29  
30  
31 **Funding:** The present study was supported by the Shanghai Municipal Commission of  
32  
33 Health and Family Planning: Shanghai Municipal Enhancing Public Health 3-year Program  
34  
35 (2011–2013) (11PH1951202), National Science Foundation of China  
36  
37 [81872637,81728017,81602868], Shanghai Municipal Commission of Health and Family  
38  
39 Planning[201840324,20164Y0095]; Project of Shanghai Collaborative Innovation Center for  
40  
41 Translational Medicine [TM201720], Program of National Science and Technology  
42  
43 Commission for association of diabetes and nutrition in adolescent [2016YFC1305203],  
44  
45 Medical and Engineering Cooperation Project of Shanghai Jiao Tong University  
46  
47 [YG2017ZD15],The Project of Shanghai Children’s Health Service Capacity Construction  
48  
49 [GDEK201708], National Human Genetic Resources Sharing Service Platform  
50  
51 [2005DKA21300], Science and Technology Development Program of Pudong Shanghai New  
52  
53 District [PKJ2017-Y01], Science Innovation Funding of Shanghai Jiaotong University  
54  
55 School of Medicine [Z2016-02], and Shanghai Professional and Technical Services Platform  
56  
57 [18DZ2294100]..

58  
59 **Data sharing statement:** No additional data are available.

## References

1. WHO. Facts and figures on childhood obesity <http://www.who.int/end-childhood-obesity/facts/en/>: World Health Organization (WHO); [updated 29 October 2014; cited 2015 30 April]. Available from: Available from: <http://www.who.int/end-childhood-obesity/facts/en/> accessed 12 May 2015.
2. Cunningham SA, Kramer MR, Narayan KM. Incidence of childhood obesity in the United States. *The New England journal of medicine* 2014;370(17):1660-1. doi: 10.1056/NEJMc1402397
3. Fallucca S, Vasta M, Sciullo E, et al. Birth weight: genetic and intrauterine environment in normal pregnancy. *Diabetes care* 2009;32(12):e149. doi: 10.2337/dc09-1489
4. Mohammad K, Kassab M, Gamble J, et al. Factors associated with birth weight inequalities in Jordan. *Int Nurs Rev* 2014;61(3):435-40. doi: 10.1111/inr.12120
5. Labayen I, Moreno LA, Ruiz JR, et al. Small birth weight and later body composition and fat distribution in adolescents: the Avena study. *Obesity (Silver Spring)* 2008;16(7):1680-6. doi: 10.1038/oby.2008.258
6. Yu ZB, Han SP, Zhu GZ, et al. Birth weight and subsequent risk of obesity: a systematic review and meta-analysis. *Obes Rev* 2011;12(7):525-42. doi: 10.1111/j.1467-789X.2011.00867.x
7. Ye R, Pei L, Ren A, et al. Birth weight, maternal body mass index, and early childhood growth: a prospective birth cohort study in China. *Journal of epidemiology / Japan Epidemiological Association* 2010;20(6):421-8.
8. Weng SF, Redsell SA, Swift JA, et al. Systematic review and meta-analyses of risk factors for childhood overweight identifiable during infancy. *Archives of disease in childhood* 2012;97(12):1019-26. doi: 10.1136/archdischild-2012-302263
9. Kapral N, Miller SE, Scharf RJ, et al. Associations between birthweight and overweight and obesity in school-age children. *Pediatric obesity* 2017 doi: 10.1111/ijpo.12227
10. Newby PK, Dickman PW, Adami HO, et al. Early anthropometric measures and reproductive factors as predictors of body mass index and obesity among older women.

- 1  
2  
3  
4 *Int J Obes (Lond)* 2005;29(9):1084-92. doi: 10.1038/sj.ijo.0802996
- 5  
6 11. Tian JY, Cheng Q, Song XM, et al. Birth weight and risk of type 2 diabetes, abdominal  
7 obesity and hypertension among Chinese adults. *European journal of endocrinology /*  
8 *European Federation of Endocrine Societies* 2006;155(4):601-7. doi:  
9 10.1530/eje.1.02265
- 10  
11  
12  
13 12. Gomes FM, Subramanian SV, Escobar AM, et al. No association between low birth  
14 weight and cardiovascular risk factors in early adulthood: evidence from Sao Paulo,  
15 Brazil. *PloS one* 2013;8(6):e66554. doi: 10.1371/journal.pone.0066554
- 16  
17  
18  
19 13. Lindberg J, Norman M, Westrup B, et al. Overweight, Obesity, and Body Composition in  
20 3.5- and 7-Year-Old Swedish Children Born with Marginally Low Birth Weight. *The*  
21 *Journal of pediatrics* 2015;167(6):1246-52 e3. doi: 10.1016/j.jpeds.2015.08.045
- 22  
23  
24  
25 14. Chen C, Jin Z, Yang Y, et al. Prevalence of grade 1, 2 and 3 thinness is associated with  
26 lower socio-economic status in children in Shanghai, China. *Public health nutrition*  
27 2016;19(11):2002-10. doi: 10.1017/S1368980016000045
- 28  
29  
30  
31 15. Cole TJ, Lobstein T. Extended international (IOTF) body mass index cut-offs for  
32 thinness, overweight and obesity. *Pediatr Obes* 2012;7(4):284-94. doi:  
33 10.1111/j.2047-6310.2012.00064.x
- 34  
35  
36  
37 16. Qiao Y, Ma J, Wang Y, et al. Birth weight and childhood obesity: a 12-country study. *Int*  
38 *J Obes Suppl* 2015;5(Suppl 2):S74-9. doi: 10.1038/ijosup.2015.23
- 39  
40  
41  
42 17. Ye T. Middle Income and Middle Income Group in Shanghai. *Journal Of Social Sciences*  
43 2006(9):91-100.
- 44  
45  
46  
47 18. Schellong K, Schulz S, Harder T, et al. Birth weight and long-term overweight risk:  
48 systematic review and a meta-analysis including 643,902 persons from 66 studies and 26  
49 countries globally. *PloS one* 2012;7(10):e47776. doi: 10.1371/journal.pone.0047776
- 50  
51  
52  
53 19. Zhang X, Liu E, Tian Z, et al. High birth weight and overweight or obesity among  
54 Chinese children 3-6 years old. *Prev Med* 2009;49(2-3):172-8. doi:  
55 10.1016/j.ypmed.2009.07.013
- 56  
57  
58  
59 20. Li N, Liu E, Sun S, et al. Birth weight and overweight or obesity risk in children under 3  
60

- years in China. *Am J Hum Biol* 2014;26(3):331-6. doi: 10.1002/ajhb.22506
21. Loaiza S, Coustasse A, Urrutia-Rojas X, et al. Birth weight and obesity risk at first grade in a cohort of Chilean children. *Nutricion hospitalaria* 2011;26(1):214-9.
22. Dubois L, Girard M. Early determinants of overweight at 4.5 years in a population-based longitudinal study. *Int J Obes (Lond)* 2006;30(4):610-7. doi: 10.1038/sj.ijo.0803141
23. Pei L, Kang Y, Zhao Y, et al. Changes in Socioeconomic Inequality of Low Birth Weight and Macrosomia in Shaanxi Province of Northwest China, 2010-2013: A Cross-sectional Study. *Medicine (Baltimore)* 2016;95(5):e2471. doi: 10.1097/MD.0000000000002471
24. Zhou J, Zeng L, Dang S, et al. Maternal Prenatal Nutrition and Birth Outcomes on Malnutrition among 7- to 10-Year-Old Children: A 10-Year Follow-Up. *The Journal of pediatrics* 2016 doi: 10.1016/j.jpeds.2016.06.017
25. Wang G, Johnson S, Gong Y, et al. Weight Gain in Infancy and Overweight or Obesity in Childhood across the Gestational Spectrum: a Prospective Birth Cohort Study. *Scientific reports* 2016;6:29867. doi: 10.1038/srep29867
26. Eriksson JG. Early growth and adult health outcomes--lessons learned from the Helsinki Birth Cohort Study. *Matern Child Nutr* 2005;1(3):149-54. doi: 10.1111/j.1740-8709.2005.00017.x
27. Chen W, Srinivasan SR, Yao L, et al. Low birth weight is associated with higher blood pressure variability from childhood to young adulthood: the Bogalusa Heart Study. *American journal of epidemiology* 2012;176 Suppl 7:S99-105. doi: 10.1093/aje/kws298
28. Abitbol CL, Moxey-Mims M. Chronic kidney disease: Low birth weight and the global burden of kidney disease. *Nat Rev Nephrol* 2016;12(4):199-200. doi: 10.1038/nrneph.2016.19
29. Hanson MA, Gluckman PD. Early developmental conditioning of later health and disease: physiology or pathophysiology? *Physiol Rev* 2014;94(4):1027-76. doi: 10.1152/physrev.00029.2013

**Table 1** Characteristics of the study participants

| Variables                | Number | Boys N (%)   | Girls N (%)  | $\chi^2$ | <i>P</i> value   |
|--------------------------|--------|--------------|--------------|----------|------------------|
| Number                   | 62715  | 32629 (52.0) | 30086 (48.0) |          |                  |
| Age (year)               |        |              |              | 2.76     | 0.948            |
| 3                        | 2006   | 1023(3.1)    | 983(3.3)     |          |                  |
| 4                        | 8186   | 4250(13.0)   | 3936(13.1)   |          |                  |
| 5                        | 8481   | 4434(13.6)   | 4047(13.5)   |          |                  |
| 6                        | 8237   | 4286(13.1)   | 3951(13.3)   |          |                  |
| 7                        | 8133   | 4260(13.1)   | 3873(12.9)   |          |                  |
| 8                        | 8540   | 4431(13.6)   | 4109(13.7)   |          |                  |
| 9                        | 7494   | 3876(11.9)   | 3618(12.0)   |          |                  |
| 10                       | 6477   | 3402(10.4)   | 3075(10.2)   |          |                  |
| 11                       | 5161   | 2667(8.2)    | 2494(8.3)    |          |                  |
| Body Mass Index Category |        |              |              | 803.87   | <b>&lt;0.001</b> |
| Grade 3 Thinness         | 1637   | 752(2.3)     | 885(2.9)     |          |                  |
| Grade 2 Thinness         | 2071   | 938(2.9)     | 1133(3.8)    |          |                  |
| Grade 1 Thinness         | 6568   | 3001(9.2)    | 3567(11.9)   |          |                  |
| Normal                   | 38831  | 19502(59.8)  | 19329(64.3)  |          |                  |
| Overweight               | 8614   | 5292(16.2)   | 3322(11.0)   |          |                  |
| Obesity                  | 2514   | 1696(5.2)    | 818(2.7)     |          |                  |
| Severe obesity           | 2480   | 1448(4.4)    | 1032(3.4)    |          |                  |
| Birthweight Category (g) |        |              |              | 19.88    | <b>&lt;0.001</b> |
| <2500                    | 3359   | 1622 (4.3)   | 1737 (5.3)   |          |                  |
| 2500-4000                | 59356  | 31007 (82.9) | 28349 (86.2) |          |                  |
| Neonatal Characteristics |        |              |              |          |                  |
| Pregnancy Term (Weeks)   |        |              |              | 19.22    | <b>&lt;0.001</b> |
| <37                      | 3854   | 2135(6.6)    | 1719(5.8)    |          |                  |



|                               |       |             |             |       |        |
|-------------------------------|-------|-------------|-------------|-------|--------|
| 37-42                         | 56238 | 29106(90.1) | 27132(91.0) |       |        |
| ≥42                           | 2035  | 1063(3.3)   | 972(3.3)    |       |        |
| Feeding Patterns (<4 Month)   |       |             |             | 4.59  | 0.101  |
| Breast Feeding                | 30716 | 15925(49.1) | 14791(49.5) |       |        |
| Formula Feeding               | 9959  | 5119(15.8)  | 4840(16.2)  |       |        |
| Mixed Feeding                 | 21612 | 11363(35.1) | 10249(34.3) |       |        |
| Normal Delivery               |       |             |             | 1.23  | 0.267  |
| Yes                           | 30054 | 15563(48.0) | 14491(48.5) |       |        |
| No                            | 32226 | 16831(52.0) | 15395(51.5) |       |        |
| One-Child Family              |       |             |             | 34.94 | <0.001 |
| Yes                           | 43207 | 22748(74.4) | 20459(72.3) |       |        |
| No                            | 15665 | 7816(25.6)  | 7849(27.7)  |       |        |
| Abortion                      |       |             |             | 3.16  | 0.076  |
| Yes                           | 14849 | 7818(24.2)  | 7031(23.5)  |       |        |
| No                            | 47401 | 24561(75.9) | 22840(76.5) |       |        |
| Asphyxia                      |       |             |             | 45.15 | <0.001 |
| Yes                           | 2146  | 1269(3.9)   | 877(3.1)    |       |        |
| No                            | 59732 | 30916(96.1) | 28816(97.1) |       |        |
| Socioeconomic Characteristics |       |             |             |       |        |
| Area                          |       |             |             | 3.20  | 0.074  |
| Suburban                      | 49231 | 25709(78.9) | 23522(78.3) |       |        |
| Urban                         | 13371 | 6866(21.1)  | 6505(21.7)  |       |        |
| Income                        |       |             |             | 4.92  | 0.086  |
| Low                           | 16762 | 8811(27.6)  | 7951(26.9)  |       |        |
| Middle                        | 34442 | 17898(56.0) | 16544(56.7) |       |        |
| High                          | 10279 | 5261(16.5)  | 5018(17.0)  |       |        |
| Mother's Education Level      |       |             |             | 48.07 | <0.001 |

|                          |       |             |             |       |                  |
|--------------------------|-------|-------------|-------------|-------|------------------|
| Low                      | 17541 | 9485(31.1)  | 8056(28.4)  |       |                  |
| Middle                   | 24365 | 12435(40.8) | 11930(42.1) |       |                  |
| High                     | 16972 | 8629(32.1)  | 8343(29.5)  |       |                  |
| Father's Education Level |       |             |             | 33.79 | <b>&lt;0.001</b> |
| Low                      | 15357 | 8280(27.1)  | 7077(25.0)  |       |                  |
| Middle                   | 24305 | 12467(40.8) | 11838(41.8) |       |                  |
| High                     | 19196 | 9805(32.1)  | 9391(33.2)  |       |                  |
| BMI, body mass index.    |       |             |             |       |                  |

**Table 2.** Association between low birthweight and thinness, overweight, obesity, severe obesity by multivariate logistic regression models.

| Variables        | Model 1*             |         | Model 2 #            |         | Model 3 &            |                  |
|------------------|----------------------|---------|----------------------|---------|----------------------|------------------|
|                  | Adjusted OR (95% CI) | P value | Adjusted OR (95% CI) | P value | Adjusted OR (95% CI) | P value          |
| Grade 3 Thinness | 2.16 (1.82 - 2.56)   | <0.001  | 2.12 (1.74 - 2.59)   | <0.001  | 1.99 (1.63 - 2.42)   | <b>&lt;0.001</b> |
| Grade 2 Thinness | 1.43 (1.20 - 1.70)   | <0.001  | 1.35 (1.10 - 1.65)   | <0.001  | 1.34 (1.10 - 1.64)   | <b>&lt;0.001</b> |
| Grade 1 Thinness | 1.49 (1.34 - 1.65)   | <0.001  | 1.52 (1.35 - 1.72)   | <0.001  | 1.56 (1.38 - 1.75)   | <b>&lt;0.001</b> |
| Normal           | Reference            | -       | Reference            | -       | Reference            | -                |
| Overweight       | 0.89 (0.80 - 1.00)   | 0.050   | 0.88 (0.77 - 1.00)   | 0.050   | 0.87 (0.76 - 0.99)   | <b>0.040</b>     |
| Obesity          | 1.05 (0.87 - 1.26)   | 0.620   | 1.00 (0.81 - 1.25)   | 0.970   | 0.85 (0.67 - 1.06)   | 0.150            |
| Severe Obesity   | 1.62 (1.38 - 1.90)   | <0.001  | 1.43 (1.18 - 1.75)   | <0.001  | 1.27 (1.03 - 1.55)   | <b>0.020</b>     |

OR: odds ratio; CI: confidence interval;  
 \* Model 1 adjusted for age and gender;  
 # Model 2 adjusted for age, gender and neonatal characteristics (pregnant term, feeding pattern, delivery mode, one child, abortion and asphyxia);  
 & Model 3 adjusted for age, gender, neonatal characteristics (pregnant term, feeding pattern, delivery mode, one child, abortion and asphyxia) and socioeconomic characteristics (urbanicity, parental education and family income);  
 - data is not available.

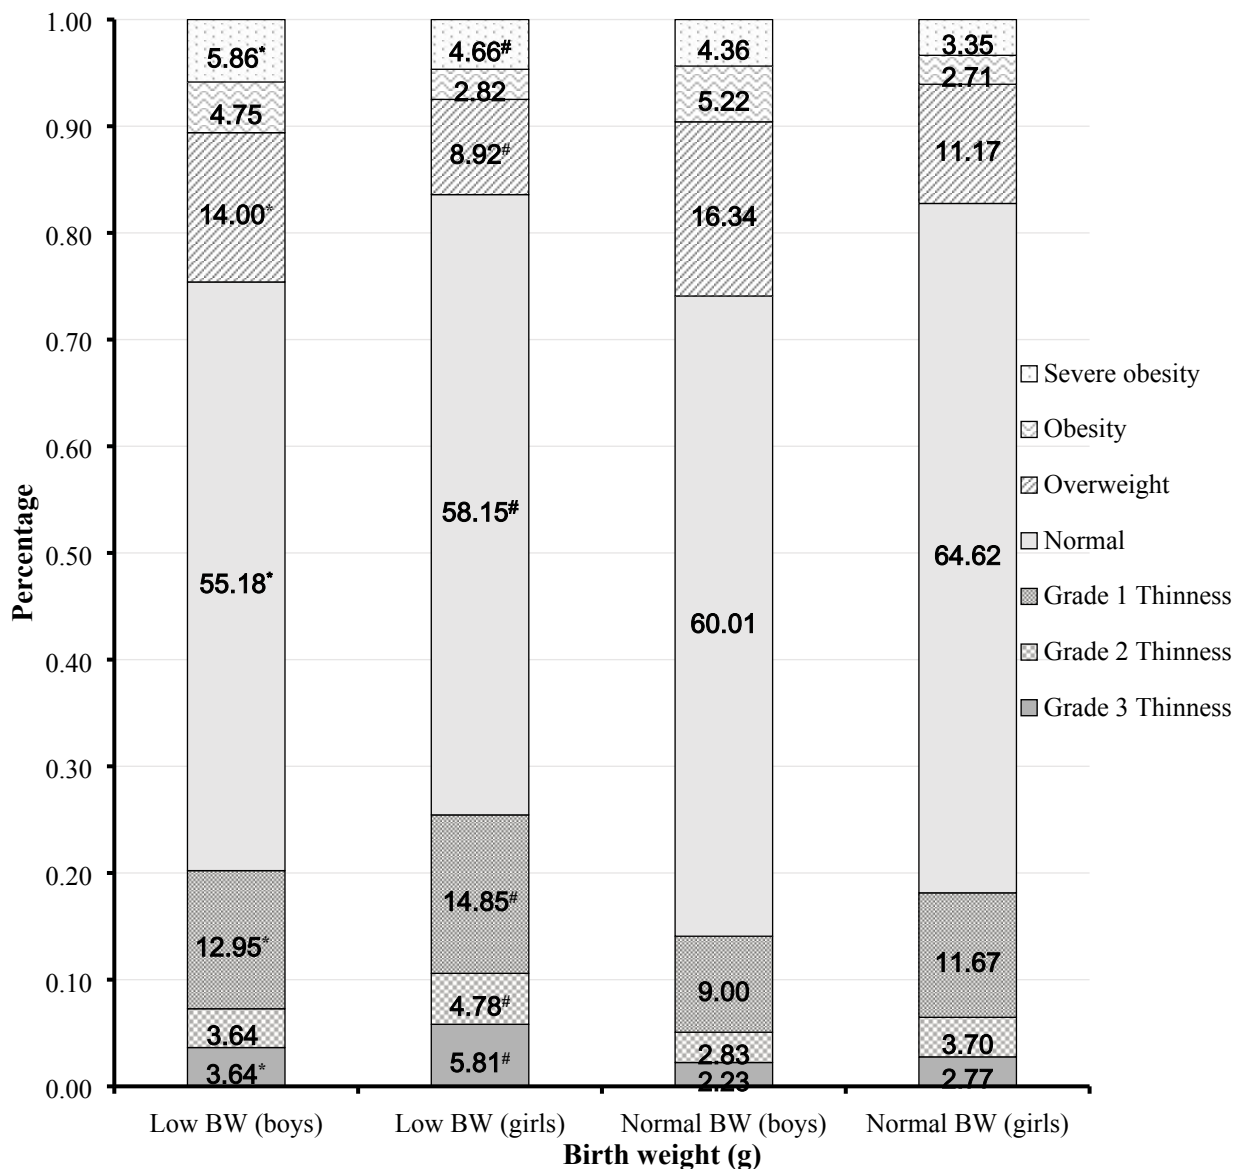

**Figure 1** Percentage of thinness, overweight, obesity and severe obesity between low and normal birthweight

\* Statistically significant difference between low and normal BW in boys ( $\chi^2$  test,  $P < 0.05$ );

# Statistically significant difference between low and normal BW in girls ( $\chi^2$  test,  $P < 0.05$ )

STROBE 2007 (v4) Statement—Checklist of items that should be included in reports of *cross-sectional studies*

| Section/Topic                | Item # | Recommendation                                                                                                                                                                       | Reported on page # |
|------------------------------|--------|--------------------------------------------------------------------------------------------------------------------------------------------------------------------------------------|--------------------|
| Title and abstract           | 1      | (a) Indicate the study’s design with a commonly used term in the title or the abstract                                                                                               | 2                  |
|                              |        | (b) Provide in the abstract an informative and balanced summary of what was done and what was found                                                                                  | 2                  |
| <b>Introduction</b>          |        |                                                                                                                                                                                      |                    |
| Background/rationale         | 2      | Explain the scientific background and rationale for the investigation being reported                                                                                                 | 3                  |
| Objectives                   | 3      | State specific objectives, including any prespecified hypotheses                                                                                                                     | 3                  |
| <b>Methods</b>               |        |                                                                                                                                                                                      | -                  |
| Study design                 | 4      | Present key elements of study design early in the paper                                                                                                                              | 3, 4               |
| Setting                      | 5      | Describe the setting, locations, and relevant dates, including periods of recruitment, exposure, follow-up, and data collection                                                      | 4                  |
| Participants                 | 6      | (a) Give the eligibility criteria, and the sources and methods of selection of participants                                                                                          | 4                  |
| Variables                    | 7      | Clearly define all outcomes, exposures, predictors, potential confounders, and effect modifiers. Give diagnostic criteria, if applicable                                             | 4,5                |
| Data sources/<br>measurement | 8*     | For each variable of interest, give sources of data and details of methods of assessment (measurement). Describe comparability of assessment methods if there is more than one group | 4,5                |
| Bias                         | 9      | Describe any efforts to address potential sources of bias                                                                                                                            |                    |
| Study size                   | 10     | Explain how the study size was arrived at                                                                                                                                            | 4                  |
| Quantitative variables       | 11     | Explain how quantitative variables were handled in the analyses. If applicable, describe which groupings were chosen and why                                                         | 4,5                |
| Statistical methods          | 12     | (a) Describe all statistical methods, including those used to control for confounding                                                                                                | 5                  |
|                              |        | (b) Describe any methods used to examine subgroups and interactions                                                                                                                  | 5                  |
|                              |        | (c) Explain how missing data were addressed                                                                                                                                          | 5                  |
|                              |        | (d) If applicable, describe analytical methods taking account of sampling strategy                                                                                                   | -                  |
|                              |        | (e) Describe any sensitivity analyses                                                                                                                                                | -                  |
| <b>Results</b>               |        |                                                                                                                                                                                      |                    |

|                          |     |                                                                                                                                                                                                              |                 |
|--------------------------|-----|--------------------------------------------------------------------------------------------------------------------------------------------------------------------------------------------------------------|-----------------|
| Participants             | 13* | (a) Report numbers of individuals at each stage of study—eg numbers potentially eligible, examined for eligibility, confirmed eligible, included in the study, completing follow-up, and analysed            | 5, 6            |
|                          |     | (b) Give reasons for non-participation at each stage                                                                                                                                                         | 5               |
|                          |     | (c) Consider use of a flow diagram                                                                                                                                                                           | -               |
| Descriptive data         | 14* | (a) Give characteristics of study participants (eg demographic, clinical, social) and information on exposures and potential confounders                                                                     | 5,6,13,14,15    |
|                          |     | (b) Indicate number of participants with missing data for each variable of interest                                                                                                                          | 5,6,13,14,15    |
| Outcome data             | 15* | Report numbers of outcome events or summary measures                                                                                                                                                         | 5,6,13,14,15    |
| Main results             | 16  | (a) Give unadjusted estimates and, if applicable, confounder-adjusted estimates and their precision (eg, 95% confidence interval). Make clear which confounders were adjusted for and why they were included | 5,6,13,14,15,16 |
|                          |     | (b) Report category boundaries when continuous variables were categorized                                                                                                                                    | 5,6,13,14,15,16 |
|                          |     | (c) If relevant, consider translating estimates of relative risk into absolute risk for a meaningful time period                                                                                             | 5,6,13,14,15    |
| Other analyses           | 17  | Report other analyses done—eg analyses of subgroups and interactions, and sensitivity analyses                                                                                                               | 5, 6            |
| <b>Discussion</b>        |     |                                                                                                                                                                                                              |                 |
| Key results              | 18  | Summarise key results with reference to study objectives                                                                                                                                                     | 7               |
| Limitations              | 19  | Discuss limitations of the study, taking into account sources of potential bias or imprecision. Discuss both direction and magnitude of any potential bias                                                   | 8,9             |
| Interpretation           | 20  | Give a cautious overall interpretation of results considering objectives, limitations, multiplicity of analyses, results from similar studies, and other relevant evidence                                   | 7,8             |
| Generalisability         | 21  | Discuss the generalisability (external validity) of the study results                                                                                                                                        | 7,8,9           |
| <b>Other information</b> |     |                                                                                                                                                                                                              |                 |
| Funding                  | 22  | Give the source of funding and the role of the funders for the present study and, if applicable, for the original study on which the present article is based                                                | 10              |

\*Give information separately for cases and controls in case-control studies and, if applicable, for exposed and unexposed groups in cohort and cross-sectional studies.

**Note:** An Explanation and Elaboration article discusses each checklist item and gives methodological background and published examples of transparent reporting. The STROBE checklist is best used in conjunction with this article (freely available on the Web sites of PLoS Medicine at <http://www.plosmedicine.org/>, Annals of Internal Medicine at <http://www.annals.org/>, and Epidemiology at <http://www.epidem.com/>). Information on the STROBE Initiative is available at [www.strobe-statement.org](http://www.strobe-statement.org).

# BMJ Open

## Association of Low Birthweight with Thinness and Severe Obesity in 3 to 12-Year-Old Children: A large-scale population-based cross-sectional study in Shanghai, China.

|                                 |                                                                                                                                                                                                                                                                                                                                                                                                                                                                                                                                                                                                                                                                                                                                                                                                                                                             |
|---------------------------------|-------------------------------------------------------------------------------------------------------------------------------------------------------------------------------------------------------------------------------------------------------------------------------------------------------------------------------------------------------------------------------------------------------------------------------------------------------------------------------------------------------------------------------------------------------------------------------------------------------------------------------------------------------------------------------------------------------------------------------------------------------------------------------------------------------------------------------------------------------------|
| Journal:                        | <i>BMJ Open</i>                                                                                                                                                                                                                                                                                                                                                                                                                                                                                                                                                                                                                                                                                                                                                                                                                                             |
| Manuscript ID                   | bmjopen-2018-028738.R1                                                                                                                                                                                                                                                                                                                                                                                                                                                                                                                                                                                                                                                                                                                                                                                                                                      |
| Article Type:                   | Research                                                                                                                                                                                                                                                                                                                                                                                                                                                                                                                                                                                                                                                                                                                                                                                                                                                    |
| Date Submitted by the Author:   | 09-Mar-2019                                                                                                                                                                                                                                                                                                                                                                                                                                                                                                                                                                                                                                                                                                                                                                                                                                                 |
| Complete List of Authors:       | Chen, Chang; Shanghai Childrens Medical Center Affiliated to Shanghai Jiaotong University School of Medicine, Pediatric Translational Medicine Institute<br>Jin, Zhijuan; Shanghai Childrens Medical Center Affiliated to Shanghai Jiaotong University School of Medicine<br>Yang, You; Shanghai Childrens Medical Center Affiliated to Shanghai Jiaotong University School of Medicine<br>Jiang, Fan; Shanghai Children's Medical Center<br>Huang, Hong; Shanghai Jiaotong University School of Medicine Xinhua Hospital, Key Laboratory of Children's Environmental Health<br>Liu, Shijian; Shanghai Childrens Medical Center Affiliated to Shanghai Jiaotong University School of Medicine, Pediatric Translational Medicine Institute<br>Jin, Xingming; Shanghai Childrens Medical Center Affiliated to Shanghai Jiaotong University School of Medicine |
| <b>Primary Subject Heading</b>: | Epidemiology                                                                                                                                                                                                                                                                                                                                                                                                                                                                                                                                                                                                                                                                                                                                                                                                                                                |
| Secondary Subject Heading:      | Paediatrics, Epidemiology                                                                                                                                                                                                                                                                                                                                                                                                                                                                                                                                                                                                                                                                                                                                                                                                                                   |
| Keywords:                       | Birthweight, Obesity, Thinness, Children                                                                                                                                                                                                                                                                                                                                                                                                                                                                                                                                                                                                                                                                                                                                                                                                                    |
|                                 |                                                                                                                                                                                                                                                                                                                                                                                                                                                                                                                                                                                                                                                                                                                                                                                                                                                             |

SCHOLARONE™  
Manuscripts

1  
2  
3 **Association of Low Birthweight with Thinness and Severe Obesity in 3 to 12-Year-Old**  
4 **Children: A large-scale population-based cross-sectional study in Shanghai, China.**  
5  
6  
7  
8  
9

10 Chang Chen,<sup>1,2,4</sup> Zhijuan Jin,<sup>3,4</sup> You Yang,<sup>3</sup> Fan Jiang,<sup>3,4</sup> Hong Huang,<sup>4\*</sup> Shijian Liu,<sup>1,2,4\*</sup> Xingming  
11 Jin<sup>3,4</sup>  
12  
13  
14  
15  
16  
17

18 <sup>1</sup> *Pediatric Translational Medicine Institute, Shanghai Children's Medical Center, Shanghai*  
19 *Jiaotong University School of Medicine, People's Republic of China*  
20  
21

22  
23 <sup>2</sup> *School of Public Health, Shanghai Jiaotong University School of Medicine, People's Republic of*  
24 *China*  
25  
26

27  
28 <sup>3</sup> *Department of Developmental and Behavioral Paediatrics, Shanghai Children's Medical Center,*  
29 *Shanghai Jiaotong University School of Medicine, Shanghai, People's Republic of China*  
30  
31

32  
33 <sup>4</sup> *Shanghai Key Laboratory of Children's Environmental Health, Xinhua Hospital, Shanghai*  
34 *Jiaotong University School of Medicine, Shanghai, People's Republic of China*  
35  
36

37 **Keywords:** Severe Obesity, Thinness, low Birthweight, Children  
38  
39  
40  
41  
42

43 **Running title:** Association of Low Birthweight with Thinness and Severe Obesity  
44  
45  
46  
47  
48

49 **\*Corresponding author.** Shijian Liu, 1678 Dongfang Road, Pediatric Translational Medicine  
50 Institute, Shanghai Children's Medical Center, Shanghai Jiaotong University School of Medicine,  
51 Shanghai, China, 200127, Tel and Fax: 86-21-38625637  
52  
53  
54

55 E-mail: liushijian@scmc.com.cn  
56  
57

58 **Co-corresponding author.** Hong Huang, 1665 Kongjiang Road, Shanghai Key Laboratory of  
59  
60



1  
2 Children's Environmental Health, Xinhua Hospital, Shanghai Jiaotong University School of  
3  
4 Medicine, Shanghai, China, 200092  
5

6  
7 E-mail: Huanghong@smhb.gov.cn  
8  
9  
10  
11  
12  
13  
14  
15  
16  
17  
18  
19  
20  
21  
22  
23  
24  
25  
26  
27  
28  
29  
30  
31  
32  
33  
34  
35  
36  
37  
38  
39  
40  
41  
42  
43  
44  
45  
46  
47  
48  
49  
50  
51  
52  
53  
54  
55  
56  
57  
58  
59  
60

For peer review only

## ABSTRACT

**Objectives:** Low birthweight (BW) is a general symbol of inadequate intrauterine conditions that elicit abnormal fetal growth and development. The aim of current study is to investigate the relationship between low BW and thinness or severe obesity during maturation.

**Design:** A large-scale cross-sectional population-based survey.

**Setting:** 134 kindergartens and 70 elementary schools.

**Participants:** 70,284 Chinese children aged 3-12 years.

**Primary and secondary outcome measures:** International Obesity Task Force BMI cut-offs were used to define grade 1, 2, 3 thinness, overweight, obesity and severe obesity. Logistic regression was used to estimate the association between birthweight and BMI category.

**Results:** Total 70,284 children participated in the survey. The percentage of grade 1 thinness and severe obesity in children with low birthweight is significantly higher than that with normal birthweight ( $P < 0.05$ ). Low BW correlated with an increased risk of grade 1 thinness (OR = 1.56, 95%CI = 1.38–1.75), grade 2 thinness (OR = 1.34, 95%CI = 1.10–1.64), grade 3 thinness (OR = 1.99, 95%CI = 1.63–2.42) and severe obesity (OR = 1.27, 95%CI = 1.03–1.55) but did not correlate with overweight.

**Conclusions:** The relationship between low BW and thinness or severe obesity risk is associated.

### Strengths and limitations of this study:

- This study is a large population-based cross-sectional survey, with a representative, multistage proportional cluster sampling.
- Low birthweight was found to be correlated with an increased risk of grade 1 thinness, grade 2 thinness, grade 3 thinness and severe obesity, rather than overweight or obesity.
- Height/weight and birthweight was collected by self-reported questionnaires in a cross-sectional study.

## INTRODUCTION

Childhood obesity is one of the most serious global public health challenges.<sup>1</sup> Furthermore, obesity in childhood may lead to short-term morbidity and to subsequent adverse consequences across the individual's lifespan and his or her subsequent generation.<sup>1</sup> Growing evidence indicates that perinatal characteristics have been recognized as contributing factors to the obesity epidemic.<sup>2</sup> Birthweight (BW) is frequently used as an indicator of the conditions experienced in utero which contribute to the newborn baby's survival, health, growth, and development.<sup>3 4</sup> Lower BW is a general symbol of inadequate intrauterine conditions that elicit abnormal fetal growth and development.<sup>5</sup> Based on the findings of numerous studies, low BW (birthweight < 2500g) has been shown to trigger various short-term and long-term health issues, especially for birth injuries, delayed motor development, delayed cognitive and social skills, obesity and chronic diseases.<sup>4 6</sup>

A great number of studies have indicated that high BW is associated with an increased risk of childhood obesity.<sup>6-9</sup> Nevertheless, the conclusions drawn by studies evaluating the associations between low BW and obesity appear to be controversial. Some studies suggest that low BW correlates with a significantly elevated risk for obesity.<sup>10 11</sup> while some other studies contradict this result, reporting that low BW is unrelated to or protective against overweight and/or obesity.<sup>6 12 13</sup> However, these studies only assess the effect of BW on childhood overweight or obesity but ignored childhood thinness.

Because of the absence of evidence regarding the relationship between BW and thinness and the inconsistent conclusions regarding the relationship of BW and overweight or obesity, in our large population-based observational study, we aimed to examine the relationship between BW and the risk of obesity and placed extra emphasis on the effect of thinness in 3–12-year-old children from 7 districts of Shanghai.

## METHODS

### Study design and quality control

1  
2  
3 Our study was a school-based cross-sectional population study and was part of a governmental  
4 population survey of autism spectrum disorders. Multistage, stratified clustered random sampling  
5 was conducted in 3 to 12-year-old children in Shanghai, China and related baseline data was  
6 collected from 134 kindergartens and 70 elementary schools in June 2014. Details of the sample  
7 size, sampling and quality control process have been described previously.<sup>14 15</sup> The 17 districts of  
8 Shanghai were stratified into eight urban districts in the central area and nine suburban areas,  
9 according to the geographical and social population distributions; people living in urban and  
10 suburban districts were defined as urban and suburban residents. EpiData 3.1 (EpiData Association,  
11 Odense, Denmark) was used for data inputting and a logical error check was applied. We also  
12 repeated data entry by randomly sampling 15% of the questionnaires to ensure consistency. The  
13 study was approved by the Institutional Review Boards of the Shanghai Municipal Commission of  
14 Health and Family Planning.

## 30 **Measurements**

31  
32  
33 We used growth questionnaires for collecting information about children's families and social  
34 environments. Teachers distributed questionnaires to students, asked students to take the  
35 questionnaire home and have their parents fill in the information, then the teachers collected the  
36 completed questionnaires and returned them to the investigator. Parents provided the following  
37 information about their children: age, sex, weight, height, birthweight, education level, and so on  
38 by self-report. Participants with complete birthweight, weight and height data constituted the final  
39 sample. BMI was calculated as weight divided by the square of height ( $\text{kg}/\text{m}^2$ ) and classified as  
40 grade 3 thinness, grade 2 thinness, grade 1 thinness, overweight, obesity and severe obesity,  
41 according to the International Obesity Task Force age- and sex-specific cut-off points, of which  
42 BMI cut-offs equal to 16.0, 17.0, 18.5, 25.0, 30.0 and 35.0  $\text{kg}/\text{m}^2$  at age 18 years, respectively.<sup>16</sup>

43  
44  
45 Birthweight, was divided into low BW group (neonates weighing  $< 2500$  g at birth, irrespective  
46 of gestational age), normal BW group (neonates weighing: 2500–4000 g at birth, irrespective of  
47 gestational age) and high BW group (neonates weighing  $\geq 4000$ g at birth, irrespective of gestational  
48 age).

age).

Neonatal characteristics including gestational weeks (< 37 weeks, 37–42 weeks and  $\geq 42$  weeks), normal delivery (yes or no), single-child family (yes or no), maternal history of abortion (yes or no), asphyxia (lack of oxygen at birth, yes or no), and infant feeding patterns (breast feeding exclusively, formula feeding exclusively, mixed feeding) were considered as potential prenatal confounding factors.<sup>6 17</sup> Moreover, parental socioeconomic characteristics were considered as follows: family income was divided into three categories (low: < 50,000 Chinese Yuan per year; middle: 50,000–200,000 Chinese Yuan per year; high:  $\geq 200,000$  Chinese Yuan per year) according to the definitions of social science,<sup>18</sup> parental education (low: illiterate, primary school and junior school; middle: high school, technical school and college; high: undergraduate, master and doctor), and residence location (urban districts: Yangpu, Xuhui, and Jing'an; suburban districts: Minhang, Pudong, Fengxian and Chongming).

### Statistical analysis

Continuous variables were presented as the mean with standard deviations (SD) and a Student's *t*-test was carried out for group comparisons. Categorical variables were presented as absolute numbers with relative frequencies (%) and inter-subgroup differences were examined using Pearson Chi-square ( $\chi^2$ ) test. Multinomial logistic regression was used to estimate the relationship between BW and the risk of childhood thinness and obesity with normal weight as a reference group. Model 1 adjusted for the basic characteristics, age and gender, which were all influence factors of BMI category. Also, neonatal characteristics were reported to be associated with both birthweight and BMI category, thus were adjusted as a confounder in model 2. Socioeconomic characteristics could reflect the environment and nutritional status to some extent and were further adjusted in model 3. All confounding variables enter into the multivariate regression model. Odds ratio (OR) and 95% confident interval (CI) were obtained by using the multiple models. All statistical analyses were performed with IBM SPSS Statistics Version 22 (SPSS, Chicago, IL, USA). The criterion for statistical significance was 0.05 by two-tailed.

## RESULTS

In total, 84,075 questionnaires were distributed and 81,384 completed questionnaires were returned with a response rate of 96.80%. Complete data regarding weight, height, and BW were available for 70,284 children. 3,359 children were born with low BW and 59,356 children were born with normal BW. 32,629 boys (52.03%) and 30,086 girls (47.97%) aged 3 to 12 years. Sex-specific variables such as growth (age, BMI category, and BW), neonatal characteristics (pregnancy term, breast-feeding, normal delivery, children number, abortion and asphyxia) and parental socioeconomic characteristics (residence, family income and parental education) were described in detail in **Table 1**.

The distribution of different BMI categories between low and normal BW was shown in **Figures 1**. Linear-by-linear trend test was performed and the chi-square tests value was 36.98 ( $P < 0.001$ ). For boys, the respective percentage of grade 3 thinness (3.64%, 95%CI 3.55-3.73%, vs. 2.23%, 95%CI 2.21-2.25%,  $P < 0.05$ ), grade 2 thinness (3.64%, 95%CI 3.55-3.73%, vs. 2.83%, 95%CI 2.81-2.85%,  $P < 0.05$ ), grade 1 thinness (12.95%, 95%CI 12.79-13.11%, vs. 9.00%, 95%CI 8.97-9.03%,  $P < 0.05$ ) were higher in the low BW group than those in the normal BW group; in contrast, the respective percentage of overweight (14.00%, 95%CI 13.83-14.17%, vs. 16.34%, 95%CI 16.30-16.38%,  $P > 0.05$ ), obesity (4.75%, 95%CI 4.65-4.85%, vs. 5.22% 95%CI 5.20-5.24%,  $P > 0.05$ ) were lower but severe obesity (5.86%, 95%CI 5.75-5.97%, vs. 4.36%, 95%CI 4.34-4.38%,  $P < 0.05$ ) was higher in low BW group compared with normal group ( $p < 0.05$ ). Meanwhile, the percentage of severe obesity and grade 3 thinness were relatively higher in low BW group compared with the normal BW group ( $P < 0.05$ ), which shows a U-shape. The pattern is similar in girls; the percentage of grade 3 thinness (5.81%, 95%CI 5.70-5.92% vs. 2.77% 95%CI 2.75-2.79%,  $P < 0.05$ ), grade 2 thinness (4.78%, 95%CI 4.68-4.88% vs. 3.70%, 95%CI 3.68-3.72%,  $P < 0.05$ ), grade 1 thinness (14.85%, 95%CI 14.68-15.02% vs. 11.67%, 95%CI 11.63-11.71%,  $P < 0.05$ ) were higher but overweight (8.92%, 95%CI 8.79-9.05%, vs. 11.17%, 95%CI 11.13-11.21%,  $P < 0.05$ ), obesity (2.82%, 95%CI 2.74-2.90%, vs. 2.71%, 95%CI 2.69-2.73,

1  
2  
3  $P > 0.05$ ) and severe obesity (4.66%, 95%CI 4.56-4.76% vs. 3.35%, 95%CI 3.33-3.37,  $P < 0.05$ )  
4 were lower in low BW group.  
5

6  
7 Multivariable logistic regression was used to further determine the relationship between BW and  
8 thinness, overweight and obesity after adjusting for potential confounders. As is shown in **Table 2**,  
9 an initial analysis was performed in model 1 adjusting for only age and gender variables. The  
10 results showed that low BW is significantly correlated with a higher risk for both thinness (grade 3  
11 thinness: OR = 2.16, 95%CI = 1.82–2.56; grade 2 thinness: OR = 1.43, 95%CI = 1.20–1.70; grade  
12 1 thinness: OR = 1.49, 95%CI = 1.34–1.65) and severe obesity (OR = 1.62, 95%CI: 1.38–1.90). In  
13 addition, model 2 is further adjusted for neonatal characteristics based on model 1 and model 3  
14 characterized by additional adjustments for socioeconomic variables based on model 2. Still, low  
15 BW children are more likely to have grade 1 thinness (OR = 1.56, 95%CI = 1.38–1.75), grade 2  
16 thinness (OR = 1.34, 95%CI = 1.10–1.64) and especially grade 3 thinness (OR = 1.99, 95%CI =  
17 1.63–2.42); the pattern is consistent in the three models. The low BW remained to be statistically  
18 significant predictors of severe obesity (OR = 1.27, 95%CI = 1.03–1.55).  
19  
20  
21  
22  
23  
24  
25  
26  
27  
28  
29  
30  
31  
32  
33  
34  
35

## 36 DISCUSSION

37  
38 In the present study, we reported a bidirectional effect of low BW, increasing the risk of grade 3  
39 thinness and severe obesity.  
40  
41

42  
43 Some studies have assessed the relationship between low BW and the risk of childhood obesity,  
44 but the results were controversial.<sup>6 19-23</sup> In a systematic review and meta-analysis involving eleven  
45 studies, pooled estimates for low BW (< 2500g) revealed no correlation with obesity (pooled OR =  
46 0.87, 95%CI = 0.69–1.08) using normal BW (2500–4000 g) as the reference category.<sup>6</sup> Another  
47 systematic review and meta-analysis of 30 studies found that low BW was correlated with a  
48 reduced risk of childhood obesity (pooled OR = 0.67, 95%CI = 0.59–0.76).<sup>19</sup> With regard to  
49 long-term risk of overweight and obesity, two previous papers have suggested a positive correlation  
50 with low BW, including a population-based cross-sectional survey among Chinese adults (obesity:  
51 OR = 1.99, 95%CI = 1.15–3.43),<sup>11</sup> and an observational study among older women in Sweden  
52  
53  
54  
55  
56  
57  
58  
59  
60

1  
2 (obesity: OR = 1.14, 95%CI = 1.03–1.26).<sup>10</sup> On the contrary, a large full-range BW study reported  
3 that children with a BW less than 2,500 g were protected against overweight or obesity from 6  
4 months to 3 years of life, but this correlation disappeared among boys at 2 years of age.<sup>21</sup> Our study  
5 highlighted the correlation between low BW and increased risk of severe obesity rather than  
6 overweight or obesity among the Chinese children aged between 3 and 12 years. An age-specific  
7 effect of low BW on obesity might address some of the primary reasons why previous studies have  
8 drawn contrasting conclusions. In a Swedish cohort with 285 marginally low BW (2000-2500g)  
9 and 95 normal birthweight children, no increased risk of overweight or obesity was observed by up  
10 to 7 years (BMI 0.47 kg/m<sup>2</sup> (95% CI 0.17-0.76) lower compared with controls).<sup>24</sup> Another possible  
11 explanation might be the potential of growth have not been fully developed among those low  
12 birthweight children. Not all low birthweight children undergo catch-up growth, and different  
13 growth pattern might exist. Special attention should be payed among those low birthweight  
14 children in future cohort study.

15  
16  
17  
18  
19  
20  
21  
22  
23  
24  
25  
26  
27  
28  
29  
30 It was difficult to explain the particular pattern between grade 1, 2 and 3 thinness, and various  
31 BW groups. In a follow up study in 2 rural Shaanxi counties of Northwest China, low BW was not  
32 related with boys' obesity or thinness rates (adjusted OR = 2.91, 95% CI= 0.95–8.93) but  
33 significantly correlated with increased risk of thinness among girls (adjusted OR = 4.41, 95% CI =  
34 1.77–10.97).<sup>25</sup> Our study confirmed the correlation and further demonstrated that low BW is  
35 correlated with an increased risk of subsequent grade 3 thinness, followed by grade 1 thinness, and  
36 then grade 2 thinness after adjusting for confounding variables. On the other hand, high BW  
37 exerted a protective effect on grade 2 thinness, followed by grade 1 thinness, then grade 3 thinness.  
38 Most notably, low BW was a risk factor for grade 3 thinness as well as severe obesity. We  
39 hypothesized that the relationship between BW and thinness, overweight or obesity risk was not  
40 directly linear, whereas the relationship between low BW and BMI was U-shaped. Low BW was an  
41 adverse perinatal environment factor which predicts changes to the central regulatory mechanism  
42 linked with negative influences on metabolism and BMI.<sup>26</sup> Thus, children with low BW  
43 accompanied by poor childhood weight outcomes should receive more public health attention.

44  
45  
46  
47  
48  
49  
50  
51  
52  
53  
54  
55  
56  
57  
58  
59 Several studies have indicated that abnormal BW was an important risk factor for metabolic  
60



1  
2 disease occurrence, especially for hypertension, type 2 diabetes, abdominal obesity and other  
3 chronic diseases later in life,<sup>11 27-29</sup> A proposed explanation for the relationship between BW and  
4 postnatal growth was through the concept of ‘Developmental Origins of Health and Disease’,  
5 which stated that environmental cues during critical periods of life lead to predictive adaptive  
6 responses that shaped tissue development and metabolic pathways, thereby permanently affecting  
7 long-term health and disease risk.<sup>30</sup> Our epidemiological observations might have implications for  
8 understanding intrauterine environmental influences during early development and the relationship  
9 of BW with later risk of thinness and obesity.  
10  
11  
12  
13  
14  
15  
16  
17  
18  
19  
20  
21

## 22 **Strengths and Limitations**

23  
24  
25 Our study recruited children from low- to high-income families across seven districts of the  
26 Shanghai area by a large, representative, multistage proportional cluster sampling. We were able to  
27 assess the relationship between low BW and risk of childhood thinness, obesity or severe obesity  
28 using a large sample size (n = 70,284) of children with low BW (4.61%). What’s more, we  
29 provided a comprehensive profile of the distribution of overall BMI status including grade 1, grade  
30 2, grade 3 thinness, normal weight, overweight, obesity and severe obesity in low and normal BW  
31 groups. As for the potential confounding variables corrected in the multivariable logistic regression,  
32 we took a broad range of predictors into consideration, from prenatal to postnatal.  
33  
34  
35  
36  
37  
38  
39  
40  
41

42 However, there were several limitations in our study. First, the cross-sectional nature precluded  
43 us from making cause-and-effect inferences and observing continuous age-effects and long-term  
44 effects. Because etiology of thinness and obesity could not be drawn, cohort studies are still needed  
45 to track growth trajectory of low birthweight children. Second, the information, including height  
46 and weight was collected by questionnaires because of the large sample size, and there was  
47 underlying bias of self-reported data. Also, misunderstandings of the questions on neonatal  
48 outcome is another underlying risk. In addition, the BW records might have been wrongly recalled  
49 by the parents or guardian, thus the degree and direction of potential bias in the results was  
50 unknown. Our results suggest a need for carefully designed longitudinal studies with precise  
51  
52  
53  
54  
55  
56  
57  
58  
59  
60

1  
2 physical examination and indicators to document thinness and obesity among low birthweight  
3 children.  
4  
5

## 6 7 **CONCLUSIONS** 8 9

10 In summary, low BW was positively correlated with an increased risk of thinness and severe  
11 obesity but not correlated with overweight or obesity. We call for special attention for children with  
12 abnormal BW for healthier physical development during growth, and their mothers by creating a  
13 favorable environment with recommendation on physical activity and nutrition and limitation of  
14 their alcohol and tobacco consumption to lower the risk of low BW. We hope the pattern of  
15 thinness and obesity in different BW groups may provide valuable insights to direct healthcare  
16 policies for improving outcomes and quality in later life.  
17  
18  
19  
20  
21  
22  
23  
24  
25  
26  
27

## 28 **Patient and Public Involvement** 29 30

31 Parents were informed about question and data of survey before filling in the questionnaires, they  
32 didn't involve the design, recruitment and conduct of the study, the results will be disseminated to  
33 participants as required.  
34  
35  
36  
37

## 38 **Authors' contributions** 39 40

41 ZJ, YY, FJ, HH and XJ helped perform the study. XJ and SL designed the research; CC drafted the  
42 manuscript and performed statistical analyses; SL and HH contributed to the interpretation of  
43 results and critically reviewed the manuscript; SL had primary responsibility for final content. All  
44 authors read and approved the final manuscript and declared no conflict of interest. We are grateful  
45 to all parents and teachers of the children for their assistance and cooperation in this study.  
46  
47  
48  
49  
50  
51

## 52 **Conflicts of interests** 53 54

55 The authors declare no conflict of interest.  
56  
57

## 58 **Ethics approval and consent to participate** 59 60

1  
2  
3 This study was conducted according to the guidelines in the World Medical Association (2000)  
4 Declaration of Helsinki: Ethical Principles for Medical Research Involving Human Subjects  
5 (<http://www.wma.net/en/30publications/10policies/b3/>) and the Guidelines for the Ethical Conduct  
6 of Medical Research Involving Children, revised in 2000 by the Royal College of Paediatrics and  
7 Child Health: Ethics Advisory Committee (Arch Dis Child 2000, 82, 177–182). All procedures  
8 involving human subjects were approved by the Institutional Review Boards of the Shanghai  
9 Municipal Commission of Health and Family Planning. Verbal informed consent was obtained  
10 from all participants, and witnessed and formally recorded. Parents were given notification and  
11 information about the survey at the beginning of the questionnaire, it is difficult to get written  
12 consent in large scale population-based cross-sectional study in China.  
13  
14  
15  
16  
17  
18  
19  
20  
21  
22  
23

24 **Funding:** The present study was supported by the Shanghai Municipal Commission of Health and  
25 Family Planning: Shanghai Municipal Enhancing Public Health 3-year Program (2011–2013)  
26 (11PH1951202), National Science Foundation of China [81872637,81728017,81602868], Shanghai  
27 Municipal Commission of Health and Family Planning[201840324,20164Y0095]; Project of  
28 Shanghai Collaborative Innovation Center for Translational Medicine [TM201720], Program of  
29 National Science and Technology Commission for association of diabetes and nutrition in  
30 adolescent [2016YFC1305203], Medical and Engineering Cooperation Project of Shanghai Jiao  
31 Tong University [YG2017ZD15],The Project of Shanghai Children’s Health Service Capacity  
32 Construction [GDEK201708], National Human Genetic Resources Sharing Service Platform  
33 [2005DKA21300], Science and Technology Development Program of Pudong Shanghai New  
34 District [PKJ2017-Y01], Science Innovation Funding of Shanghai Jiaotong University School of  
35 Medicine [Z2016-02], and Shanghai Professional and Technical Services Platform  
36 [18DZ2294100]..  
37  
38  
39  
40  
41  
42  
43  
44  
45  
46  
47  
48  
49

50  
51 **Data sharing statement:** All data relevant to the study are included in the article.  
52  
53  
54  
55  
56  
57  
58  
59  
60

## References

1. WHO. Facts and figures on childhood obesity <http://www.who.int/end-childhood-obesity/facts/en/>: World Health Organization (WHO); [updated 29 October 2014; cited 2015 30 April]. Available from: <http://www.who.int/end-childhood-obesity/facts/en/> accessed 12 May 2015.
2. Cunningham SA, Kramer MR, Narayan KM. Incidence of childhood obesity in the United States. *The New England journal of medicine* 2014;370(17):1660-1. doi: 10.1056/NEJMc1402397
3. Fallucca S, Vasta M, Sciallo E, et al. Birth weight: genetic and intrauterine environment in normal pregnancy. *Diabetes care* 2009;32(12):e149. doi: 10.2337/dc09-1489
4. Mohammad K, Kassab M, Gamble J, et al. Factors associated with birth weight inequalities in Jordan. *Int Nurs Rev* 2014;61(3):435-40. doi: 10.1111/inr.12120
5. Labayen I, Moreno LA, Ruiz JR, et al. Small birth weight and later body composition and fat distribution in adolescents: the Avena study. *Obesity (Silver Spring)* 2008;16(7):1680-6. doi: 10.1038/oby.2008.258
6. Yu ZB, Han SP, Zhu GZ, et al. Birth weight and subsequent risk of obesity: a systematic review and meta-analysis. *Obes Rev* 2011;12(7):525-42. doi: 10.1111/j.1467-789X.2011.00867.x
7. Ye R, Pei L, Ren A, et al. Birth weight, maternal body mass index, and early childhood growth: a prospective birth cohort study in China. *Journal of epidemiology / Japan Epidemiological Association* 2010;20(6):421-8.
8. Weng SF, Redsell SA, Swift JA, et al. Systematic review and meta-analyses of risk factors for childhood overweight identifiable during infancy. *Archives of disease in childhood* 2012;97(12):1019-26. doi: 10.1136/archdischild-2012-302263
9. Kapral N, Miller SE, Scharf RJ, et al. Associations between birthweight and overweight

- and obesity in school-age children. *Pediatric obesity* 2017 doi: 10.1111/ijpo.12227
10. Newby PK, Dickman PW, Adami HO, et al. Early anthropometric measures and reproductive factors as predictors of body mass index and obesity among older women. *Int J Obes (Lond)* 2005;29(9):1084-92. doi: 10.1038/sj.ijo.0802996
  11. Tian JY, Cheng Q, Song XM, et al. Birth weight and risk of type 2 diabetes, abdominal obesity and hypertension among Chinese adults. *European journal of endocrinology / European Federation of Endocrine Societies* 2006;155(4):601-7. doi: 10.1530/eje.1.02265
  12. Gomes FM, Subramanian SV, Escobar AM, et al. No association between low birth weight and cardiovascular risk factors in early adulthood: evidence from Sao Paulo, Brazil. *PloS one* 2013;8(6):e66554. doi: 10.1371/journal.pone.0066554
  13. Lindberg J, Norman M, Westrup B, et al. Overweight, Obesity, and Body Composition in 3.5- and 7-Year-Old Swedish Children Born with Marginally Low Birth Weight. *The Journal of pediatrics* 2015;167(6):1246-52 e3. doi: 10.1016/j.jpeds.2015.08.045
  14. Chen C, Jin Z, Yang Y, et al. Prevalence of grade 1, 2 and 3 thinness is associated with lower socio-economic status in children in Shanghai, China. *Public health nutrition* 2016;19(11):2002-10. doi: 10.1017/S1368980016000045
  15. Jin Z, Yang Y, Liu S, et al. Prevalence of DSM-5 Autism Spectrum Disorder Among School-Based Children Aged 3-12 Years in Shanghai, China. *J Autism Dev Disord.* 2018;48(7):2434-43. doi: 10.1007/s10803-018-3507-z
  16. Cole TJ, Lobstein T. Extended international (IOTF) body mass index cut-offs for thinness, overweight and obesity. *Pediatr Obes* 2012;7(4):284-94. doi: 10.1111/j.2047-6310.2012.00064.x
  17. Qiao Y, Ma J, Wang Y, et al. Birth weight and childhood obesity: a 12-country study. *Int J Obes Suppl* 2015;5(Suppl 2):S74-9. doi: 10.1038/ijosup.2015.23

- 1  
2  
3  
4 18. Ye T. Middle Income and Middle Income Group in Shanghai. *Journal Of Social Sciences*  
5 2006(9):91-100.  
6  
7
- 8  
9 19. Schellong K, Schulz S, Harder T, et al. Birth weight and long-term overweight risk:  
10 systematic review and a meta-analysis including 643,902 persons from 66 studies and 26  
11 countries globally. *PloS one* 2012;7(10):e47776. doi: 10.1371/journal.pone.0047776  
12  
13
- 14  
15 20. Zhang X, Liu E, Tian Z, et al. High birth weight and overweight or obesity among  
16 Chinese children 3-6 years old. *Prev Med* 2009;49(2-3):172-8. doi:  
17 10.1016/j.ypmed.2009.07.013  
18  
19
- 20  
21 21. Li N, Liu E, Sun S, et al. Birth weight and overweight or obesity risk in children under 3  
22 years in China. *Am J Hum Biol* 2014;26(3):331-6. doi: 10.1002/ajhb.22506  
23  
24
- 25  
26 22. Loaiza S, Coustasse A, Urrutia-Rojas X, et al. Birth weight and obesity risk at first grade  
27 in a cohort of Chilean children. *Nutricion hospitalaria* 2011;26(1):214-9.  
28  
29
- 30  
31 23. Dubois L, Girard M. Early determinants of overweight at 4.5 years in a population-based  
32 longitudinal study. *Int J Obes (Lond)* 2006;30(4):610-7. doi: 10.1038/sj.ijo.0803141  
33  
34
- 35  
36 24. Pei L, Kang Y, Zhao Y, et al. Changes in Socioeconomic Inequality of Low Birth Weight  
37 and Macrosomia in Shaanxi Province of Northwest China, 2010-2013: A Cross-sectional  
38 Study. *Medicine (Baltimore)* 2016;95(5):e2471. doi: 10.1097/MD.0000000000002471  
39  
40
- 41  
42 25. Zhou J, Zeng L, Dang S, et al. Maternal Prenatal Nutrition and Birth Outcomes on  
43 Malnutrition among 7- to 10-Year-Old Children: A 10-Year Follow-Up. *The Journal of*  
44 *pediatrics* 2016 doi: 10.1016/j.jpeds.2016.06.017  
45  
46
- 47  
48 26. Wang G, Johnson S, Gong Y, et al. Weight Gain in Infancy and Overweight or Obesity  
49 in Childhood across the Gestational Spectrum: a Prospective Birth Cohort Study.  
50 *Scientific reports* 2016;6:29867. doi: 10.1038/srep29867  
51  
52
- 53  
54 27. Eriksson JG. Early growth and adult health outcomes--lessons learned from the Helsinki  
55 Birth Cohort Study. *Matern Child Nutr* 2005;1(3):149-54. doi:  
56  
57
- 58  
59  
60

1  
2  
3  
4 10.1111/j.1740-8709.2005.00017.x  
5

- 6  
7 28. Chen W, Srinivasan SR, Yao L, et al. Low birth weight is associated with higher blood  
8 pressure variability from childhood to young adulthood: the Bogalusa Heart Study.  
9 *American journal of epidemiology* 2012;176 Suppl 7:S99-105. doi: 10.1093/aje/kws298  
10  
11  
12  
13 29. Abitbol CL, Moxey-Mims M. Chronic kidney disease: Low birth weight and the global  
14 burden of kidney disease. *Nat Rev Nephrol* 2016;12(4):199-200.  
15  
16  
17  
18 30. Hanson MA, Gluckman PD. Early developmental conditioning of later health and  
19 disease: physiology or pathophysiology? *Physiol Rev* 2014;94(4):1027-76. doi:  
20  
21 10.1152/physrev.00029.2013  
22  
23  
24  
25  
26  
27  
28  
29  
30  
31  
32  
33  
34  
35  
36  
37  
38  
39  
40  
41  
42  
43  
44  
45  
46  
47  
48  
49  
50  
51  
52  
53  
54  
55  
56  
57  
58  
59  
60

1  
2  
3  
4  
5  
6  
7  
8  
9  
10  
11  
12  
13  
14  
15  
16  
17  
18  
19  
20  
21  
22  
23  
24  
25  
26  
27  
28  
29  
30  
31  
32  
33  
34  
35  
36  
37  
38  
39  
40  
41  
42  
43  
44  
45  
46

**Table 1** Characteristics of the study participants

| Variables                | Number | Boys N (%)   | Girls N (%)  | $\chi^2$ | <i>P</i> value   |
|--------------------------|--------|--------------|--------------|----------|------------------|
| Number                   | 62715  | 32629 (52.0) | 30086 (48.0) |          |                  |
| Age (year)               |        |              |              | 2.76     | 0.948            |
| 3-                       | 2006   | 1023(3.1)    | 983(3.3)     |          |                  |
| 4-                       | 8186   | 4250(13.0)   | 3936(13.1)   |          |                  |
| 5-                       | 8481   | 4434(13.6)   | 4047(13.5)   |          |                  |
| 6-                       | 8237   | 4286(13.1)   | 3951(13.3)   |          |                  |
| 7-                       | 8133   | 4260(13.1)   | 3873(12.9)   |          |                  |
| 8-                       | 8540   | 4431(13.6)   | 4109(13.7)   |          |                  |
| 9-                       | 7494   | 3876(11.9)   | 3618(12.0)   |          |                  |
| 10-                      | 6477   | 3402(10.4)   | 3075(10.2)   |          |                  |
| 11-                      | 5161   | 2667(8.2)    | 2494(8.3)    |          |                  |
| Body Mass Index Category |        |              |              | 803.87   | <b>&lt;0.001</b> |
| Grade 3 Thinness         | 1637   | 752(2.3)     | 885(2.9)     |          |                  |



|                          |       |              |              |       |                  |
|--------------------------|-------|--------------|--------------|-------|------------------|
| Grade 2 Thinness         | 2071  | 938(2.9)     | 1133(3.8)    |       |                  |
| Grade 1 Thinness         | 6568  | 3001(9.2)    | 3567(11.9)   |       |                  |
| Normal                   | 38831 | 19502(59.8)  | 19329(64.3)  |       |                  |
| Overweight               | 8614  | 5292(16.2)   | 3322(11.0)   |       |                  |
| Obesity                  | 2514  | 1696(5.2)    | 818(2.7)     |       |                  |
| Severe obesity           | 2480  | 1448(4.4)    | 1032(3.4)    |       |                  |
| Birthweight Category (g) |       |              |              | 19.88 | <b>&lt;0.001</b> |
| <2500                    | 3359  | 1622 (5.0)   | 1737 (5.8)   |       |                  |
| 2500-4000                | 59356 | 31007 (95.0) | 28349 (94.2) |       |                  |
| Neonatal Characteristics |       |              |              |       |                  |
| Pregnancy Term (Weeks)   |       |              |              | 19.22 | <b>&lt;0.001</b> |
| <37                      | 3854  | 2135(6.5)    | 1719(5.7)    |       |                  |
| 37-42                    | 56238 | 29106(89.2)  | 27132(90.2)  |       |                  |
| ≥42                      | 2035  | 1063(3.3)    | 972(3.2)     |       |                  |
| Missing                  | 588   | 325(1.0)     | 263(0.9)     |       |                  |

1  
2  
3  
4  
5  
6  
7  
8  
9  
10  
11  
12  
13  
14  
15  
16  
17  
18  
19  
20  
21  
22  
23  
24  
25  
26  
27  
28  
29  
30  
31  
32  
33  
34  
35  
36  
37  
38  
39  
40  
41  
42  
43  
44  
45  
46

---

Feeding Patterns (<4 Month)

4.59

0.101

|                 |       |             |             |
|-----------------|-------|-------------|-------------|
| Breast Feeding  | 30716 | 15925(48.8) | 14791(49.2) |
| Formula Feeding | 9959  | 5119(15.7)  | 4840(16.1)  |
| Mixed Feeding   | 21612 | 11363(34.8) | 10249(34.1) |
| Missing         | 428   | 222(0.7)    | 206(0.7)    |

Normal Delivery

1.23

0.267

|         |       |             |             |
|---------|-------|-------------|-------------|
| Yes     | 30054 | 15563(47.7) | 14491(48.2) |
| No      | 32226 | 16831(51.6) | 15395(51.2) |
| Missing | 435   | 235(0.7)    | 200(0.7)    |

One-Child Family

34.94

**<0.001**

|         |       |             |             |
|---------|-------|-------------|-------------|
| Yes     | 43207 | 22748(69.7) | 20459(68.0) |
| No      | 15665 | 7816(24.0)  | 7849(21.6)  |
| Missing | 3843  | 2065(6.3)   | 1778(5.9)   |

Abortion

3.16

0.076

|     |       |            |            |
|-----|-------|------------|------------|
| Yes | 14849 | 7818(24.0) | 7031(23.4) |
|-----|-------|------------|------------|

---

|                               |       |             |             |       |        |
|-------------------------------|-------|-------------|-------------|-------|--------|
| No                            | 47401 | 24561(75.3) | 22840(75.9) |       |        |
| Missing                       | 465   | 250(0.8)    | 215(0.7)    |       |        |
| Asphyxia                      |       |             |             | 45.15 | <0.001 |
| Yes                           | 2146  | 1269(3.9)   | 877(2.9)    |       |        |
| No                            | 59732 | 30916(94.8) | 28816(95.8) |       |        |
| Missing                       | 837   | 444(1.4)    | 393(1.3)    |       |        |
| Socioeconomic Characteristics |       |             |             |       |        |
| Area                          |       |             |             | 3.20  | 0.074  |
| Suburban                      | 49231 | 25709(78.8) | 23522(78.2) |       |        |
| Urban                         | 13371 | 6866(21.0)  | 6505(21.6)  |       |        |
| Missing                       | 113   | 54(0.2)     | 59(0.2)     |       |        |
| Income                        |       |             |             | 4.92  | 0.086  |
| Low                           | 16762 | 8811(27.0)  | 7951(26.4)  |       |        |
| Middle                        | 34442 | 17898(54.9) | 16544(55.0) |       |        |
| High                          | 10279 | 5261(16.1)  | 5018(16.7)  |       |        |

1  
2  
3  
4  
5  
6  
7  
8  
9  
10  
11  
12  
13  
14  
15  
16  
17  
18  
19  
20  
21  
22  
23  
24  
25  
26  
27  
28  
29  
30  
31  
32  
33  
34  
35  
36  
37  
38  
39  
40  
41  
42  
43  
44  
45  
46

---

|                          |       |             |             |       |                  |
|--------------------------|-------|-------------|-------------|-------|------------------|
| Missing                  | 1232  | 659(2.0)    | 573(1.9)    |       |                  |
| Mother's Education Level |       |             |             | 48.07 | <b>&lt;0.001</b> |
| Low                      | 17541 | 9485(29.1)  | 8056(26.8)  |       |                  |
| Middle                   | 24365 | 12435(38.1) | 11930(39.7) |       |                  |
| High                     | 16972 | 8629(26.4)  | 8343(27.7)  |       |                  |
| Missing                  | 3837  | 2080(6.4)   | 1757(5.8)   |       |                  |
| Father's Education Level |       |             |             | 33.79 | <b>&lt;0.001</b> |
| Low                      | 15357 | 8280(25.4)  | 7077(23.5)  |       |                  |
| Middle                   | 24305 | 12467(38.2) | 11838(39.3) |       |                  |
| High                     | 19196 | 9805(30.0)  | 9391(31.2)  |       |                  |
| Missing                  | 3857  | 2077(6.4)   | 1780(5.9)   |       |                  |

---

BMI, body mass index.

**Table 2.** Association between low birthweight and thinness, overweight, obesity, severe obesity by multivariate logistic regression models.

|         | N      | Grade 3 Thinness   | Grade 2 Thinness   | Grade 1 Thinness   | Overweight         | Obesity            | Severe Obesity     |
|---------|--------|--------------------|--------------------|--------------------|--------------------|--------------------|--------------------|
| Model 1 | 62,715 | 2.16 (1.82 - 2.56) | 1.43 (1.20 - 1.70) | 1.49 (1.34 - 1.65) | 0.89 (0.80 - 1.00) | 1.05 (0.87 - 1.26) | 1.62 (1.38 - 1.90) |
| Model 2 | 56,909 | 2.12 (1.74 - 2.59) | 1.35 (1.10 - 1.65) | 1.52 (1.35 - 1.72) | 0.88 (0.77 - 1.00) | 1.00 (0.81 - 1.25) | 1.43 (1.18 - 1.75) |
| Model 3 | 55,600 | 1.99 (1.63 - 2.42) | 1.34 (1.10 - 1.64) | 1.56 (1.38 - 1.75) | 0.87 (0.76 - 0.99) | 0.85 (0.67 - 1.06) | 1.27 (1.03 - 1.55) |

OR: odds ratio; CI: confidence interval;

Normal BMI as the reference group.

\* *P* value <0.05.

Model 1: adjusted for age and gender;

Model 2: adjusted for age, gender and neonatal characteristics (pregnant term, feeding pattern, delivery mode, one child, abortion and asphyxia);

Model 3: adjusted for age, gender, neonatal characteristics (pregnant term, feeding pattern, delivery mode, one child, abortion and asphyxia) and socioeconomic characteristics (urbanicity, parental education and family income);

1  
2  
3 **Figure Legend**  
4  
5  
6  
7

8 **Figure 1** Percentage of thinness, overweight, obesity and severe obesity between low  
9 and normal birthweight  
10

11 \* Statistically significant difference between low and normal BW in boys ( $\chi^2$  test,  $P < 0.05$ );  
12  
13

14 # Statistically significant difference between low and normal BW in girls ( $\chi^2$  test,  $P < 0.05$ ).  
15  
16  
17  
18  
19  
20  
21  
22  
23  
24  
25  
26  
27  
28  
29  
30  
31  
32  
33  
34  
35  
36  
37  
38  
39  
40  
41  
42  
43  
44  
45  
46  
47  
48  
49  
50  
51  
52  
53  
54  
55  
56  
57  
58  
59  
60

For peer review only

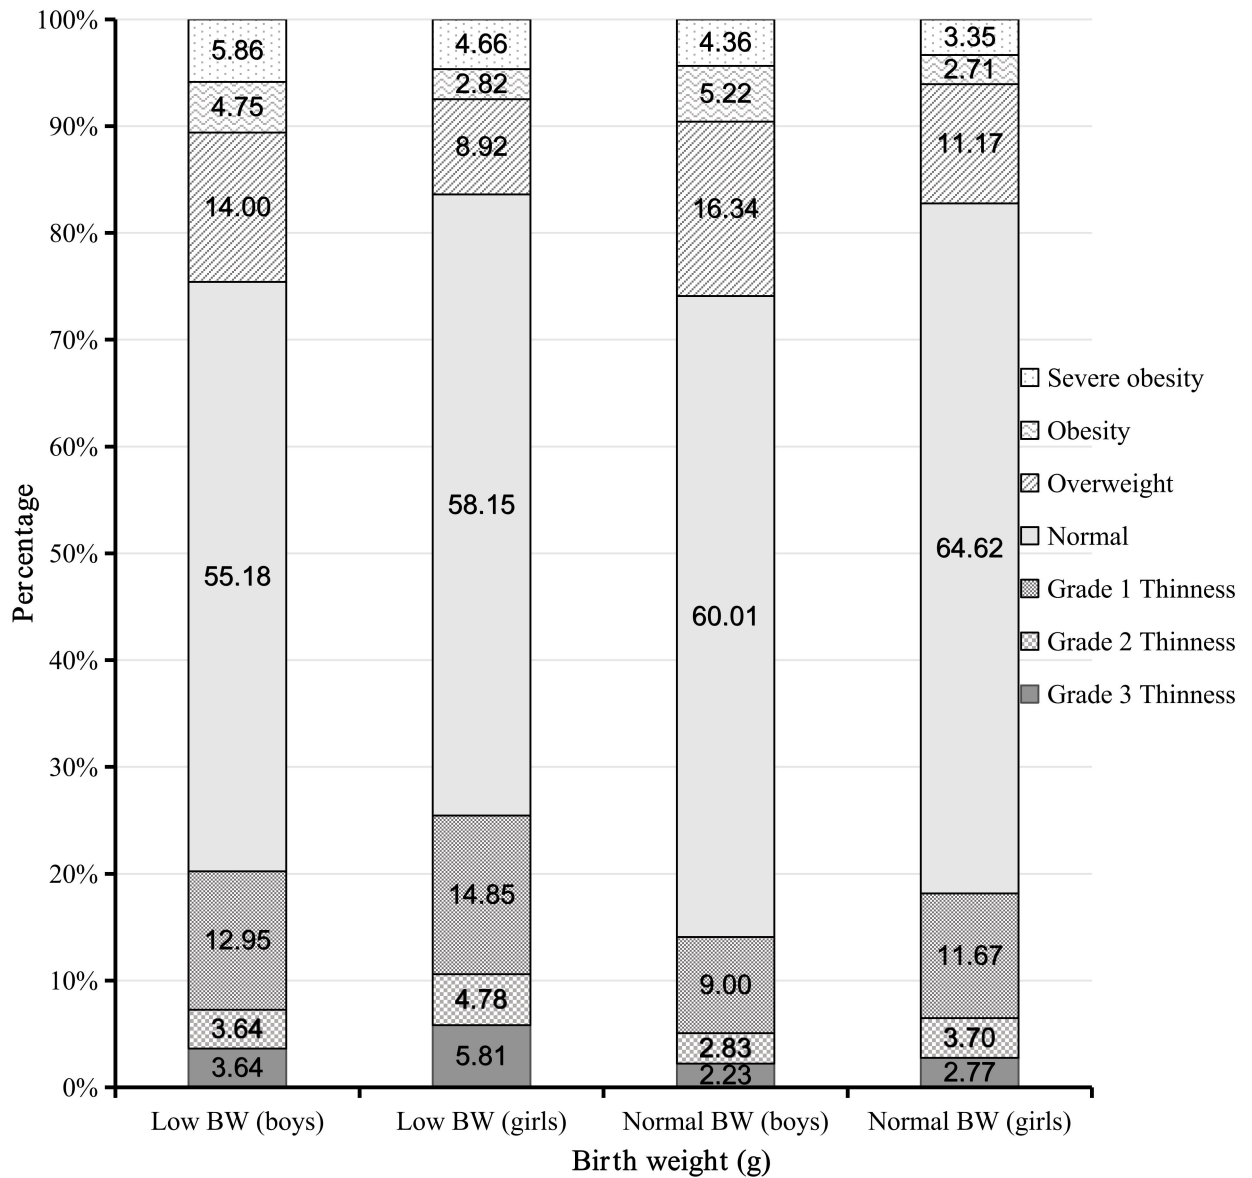

**Figure 1** Percentage of thinness, overweight, obesity and severe obesity between low and normal birthweight

**STROBE 2007 (v4) Statement—Checklist of items that should be included in reports of *cross-sectional studies***

| Section/Topic                | Item # | Recommendation                                                                                                                                                                       | Reported on page # |
|------------------------------|--------|--------------------------------------------------------------------------------------------------------------------------------------------------------------------------------------|--------------------|
| <b>Title and abstract</b>    | 1      | (a) Indicate the study’s design with a commonly used term in the title or the abstract                                                                                               | 2                  |
|                              |        | (b) Provide in the abstract an informative and balanced summary of what was done and what was found                                                                                  | 2                  |
| <b>Introduction</b>          |        |                                                                                                                                                                                      |                    |
| Background/rationale         | 2      | Explain the scientific background and rationale for the investigation being reported                                                                                                 | 3                  |
| Objectives                   | 3      | State specific objectives, including any prespecified hypotheses                                                                                                                     | 3                  |
| <b>Methods</b>               |        |                                                                                                                                                                                      | -                  |
| Study design                 | 4      | Present key elements of study design early in the paper                                                                                                                              | 3, 4               |
| Setting                      | 5      | Describe the setting, locations, and relevant dates, including periods of recruitment, exposure, follow-up, and data collection                                                      | 4                  |
| Participants                 | 6      | (a) Give the eligibility criteria, and the sources and methods of selection of participants                                                                                          | 4                  |
| Variables                    | 7      | Clearly define all outcomes, exposures, predictors, potential confounders, and effect modifiers. Give diagnostic criteria, if applicable                                             | 4,5                |
| Data sources/<br>measurement | 8*     | For each variable of interest, give sources of data and details of methods of assessment (measurement). Describe comparability of assessment methods if there is more than one group | 4,5                |
| Bias                         | 9      | Describe any efforts to address potential sources of bias                                                                                                                            |                    |
| Study size                   | 10     | Explain how the study size was arrived at                                                                                                                                            | 4                  |
| Quantitative variables       | 11     | Explain how quantitative variables were handled in the analyses. If applicable, describe which groupings were chosen and why                                                         | 4,5                |
| Statistical methods          | 12     | (a) Describe all statistical methods, including those used to control for confounding                                                                                                | 5                  |
|                              |        | (b) Describe any methods used to examine subgroups and interactions                                                                                                                  | 5                  |
|                              |        | (c) Explain how missing data were addressed                                                                                                                                          | 5                  |
|                              |        | (d) If applicable, describe analytical methods taking account of sampling strategy                                                                                                   | -                  |
|                              |        | (e) Describe any sensitivity analyses                                                                                                                                                | -                  |
| <b>Results</b>               |        |                                                                                                                                                                                      |                    |



|                          |     |                                                                                                                                                                                                              |                 |
|--------------------------|-----|--------------------------------------------------------------------------------------------------------------------------------------------------------------------------------------------------------------|-----------------|
| Participants             | 13* | (a) Report numbers of individuals at each stage of study—eg numbers potentially eligible, examined for eligibility, confirmed eligible, included in the study, completing follow-up, and analysed            | 5, 6            |
|                          |     | (b) Give reasons for non-participation at each stage                                                                                                                                                         | 5               |
|                          |     | (c) Consider use of a flow diagram                                                                                                                                                                           | -               |
| Descriptive data         | 14* | (a) Give characteristics of study participants (eg demographic, clinical, social) and information on exposures and potential confounders                                                                     | 5,6,13,14,15    |
|                          |     | (b) Indicate number of participants with missing data for each variable of interest                                                                                                                          | 5,6,13,14,15    |
| Outcome data             | 15* | Report numbers of outcome events or summary measures                                                                                                                                                         | 5,6,13,14,15    |
| Main results             | 16  | (a) Give unadjusted estimates and, if applicable, confounder-adjusted estimates and their precision (eg, 95% confidence interval). Make clear which confounders were adjusted for and why they were included | 5,6,13,14,15,16 |
|                          |     | (b) Report category boundaries when continuous variables were categorized                                                                                                                                    | 5,6,13,14,15,16 |
|                          |     | (c) If relevant, consider translating estimates of relative risk into absolute risk for a meaningful time period                                                                                             | 5,6,13,14,15    |
| Other analyses           | 17  | Report other analyses done—eg analyses of subgroups and interactions, and sensitivity analyses                                                                                                               | 5, 6            |
| <b>Discussion</b>        |     |                                                                                                                                                                                                              |                 |
| Key results              | 18  | Summarise key results with reference to study objectives                                                                                                                                                     | 7               |
| Limitations              | 19  | Discuss limitations of the study, taking into account sources of potential bias or imprecision. Discuss both direction and magnitude of any potential bias                                                   | 8,9             |
| Interpretation           | 20  | Give a cautious overall interpretation of results considering objectives, limitations, multiplicity of analyses, results from similar studies, and other relevant evidence                                   | 7,8             |
| Generalisability         | 21  | Discuss the generalisability (external validity) of the study results                                                                                                                                        | 7,8,9           |
| <b>Other information</b> |     |                                                                                                                                                                                                              |                 |
| Funding                  | 22  | Give the source of funding and the role of the funders for the present study and, if applicable, for the original study on which the present article is based                                                | 10              |

\*Give information separately for cases and controls in case-control studies and, if applicable, for exposed and unexposed groups in cohort and cross-sectional studies.

**Note:** An Explanation and Elaboration article discusses each checklist item and gives methodological background and published examples of transparent reporting. The STROBE checklist is best used in conjunction with this article (freely available on the Web sites of PLoS Medicine at <http://www.plosmedicine.org/>, Annals of Internal Medicine at <http://www.annals.org/>, and Epidemiology at <http://www.epidem.com/>). Information on the STROBE Initiative is available at [www.strobe-statement.org](http://www.strobe-statement.org).

# BMJ Open

## Association of Low Birthweight with Thinness and Severe Obesity in 3 to 12-Year-Old Children: A large-scale population-based cross-sectional study in Shanghai, China.

|                                 |                                                                                                                                                                                                                                                                                                                                                                                                                                                                                                                                                                                                                                                                                                                                                                                                                                                             |
|---------------------------------|-------------------------------------------------------------------------------------------------------------------------------------------------------------------------------------------------------------------------------------------------------------------------------------------------------------------------------------------------------------------------------------------------------------------------------------------------------------------------------------------------------------------------------------------------------------------------------------------------------------------------------------------------------------------------------------------------------------------------------------------------------------------------------------------------------------------------------------------------------------|
| Journal:                        | <i>BMJ Open</i>                                                                                                                                                                                                                                                                                                                                                                                                                                                                                                                                                                                                                                                                                                                                                                                                                                             |
| Manuscript ID                   | bmjopen-2018-028738.R2                                                                                                                                                                                                                                                                                                                                                                                                                                                                                                                                                                                                                                                                                                                                                                                                                                      |
| Article Type:                   | Research                                                                                                                                                                                                                                                                                                                                                                                                                                                                                                                                                                                                                                                                                                                                                                                                                                                    |
| Date Submitted by the Author:   | 09-Apr-2019                                                                                                                                                                                                                                                                                                                                                                                                                                                                                                                                                                                                                                                                                                                                                                                                                                                 |
| Complete List of Authors:       | Chen, Chang; Shanghai Childrens Medical Center Affiliated to Shanghai Jiaotong University School of Medicine, Pediatric Translational Medicine Institute<br>Jin, Zhijuan; Shanghai Childrens Medical Center Affiliated to Shanghai Jiaotong University School of Medicine<br>Yang, You; Shanghai Childrens Medical Center Affiliated to Shanghai Jiaotong University School of Medicine<br>Jiang, Fan; Shanghai Children's Medical Center<br>Huang, Hong; Shanghai Jiaotong University School of Medicine Xinhua Hospital, Key Laboratory of Children's Environmental Health<br>Liu, Shijian; Shanghai Childrens Medical Center Affiliated to Shanghai Jiaotong University School of Medicine, Pediatric Translational Medicine Institute<br>Jin, Xingming; Shanghai Childrens Medical Center Affiliated to Shanghai Jiaotong University School of Medicine |
| <b>Primary Subject Heading</b>: | Epidemiology                                                                                                                                                                                                                                                                                                                                                                                                                                                                                                                                                                                                                                                                                                                                                                                                                                                |
| Secondary Subject Heading:      | Paediatrics, Epidemiology                                                                                                                                                                                                                                                                                                                                                                                                                                                                                                                                                                                                                                                                                                                                                                                                                                   |
| Keywords:                       | Birthweight, Obesity, Thinness, Children                                                                                                                                                                                                                                                                                                                                                                                                                                                                                                                                                                                                                                                                                                                                                                                                                    |
|                                 |                                                                                                                                                                                                                                                                                                                                                                                                                                                                                                                                                                                                                                                                                                                                                                                                                                                             |

SCHOLARONE™  
Manuscripts

1  
2 **Association of Low Birthweight with Thinness and Severe Obesity in 3 to 12-Year-Old**  
3 **Children: A large-scale population-based cross-sectional study in Shanghai, China.**  
4  
5  
6  
7

8 Chang Chen,<sup>1,2,4</sup> Zhijuan Jin,<sup>3,4</sup> You Yang,<sup>3</sup> Fan Jiang,<sup>3,4</sup> Hong Huang,<sup>4\*</sup> Shijian Liu,<sup>1,2,4\*</sup> Xingming  
9 Jin<sup>3,4,5</sup>  
10  
11  
12  
13

14 <sup>1</sup> *Pediatric Translational Medicine Institute, Shanghai Children's Medical Center, Shanghai*  
15 *Jiaotong University School of Medicine, People's Republic of China*  
16

17 <sup>2</sup> *School of Public Health, Shanghai Jiaotong University School of Medicine, People's Republic of*  
18 *China*  
19  
20

21 <sup>3</sup> *Department of Developmental and Behavioral Paediatrics, Shanghai Children's Medical Center,*  
22 *Shanghai Jiaotong University School of Medicine, Shanghai, People's Republic of China*  
23  
24

25 <sup>4</sup> *Shanghai Key Laboratory of Children's Environmental Health, Xinhua Hospital, Shanghai*  
26 *Jiaotong University School of Medicine, Shanghai, People's Republic of China*  
27  
28

29 <sup>5</sup> *Shanghai Pubin Children Hospital.*  
30  
31

32 **Keywords** Severe Obesity, Thinness, low Birthweight, Children  
33  
34  
35

36 **Running title** Association of Low Birthweight with Thinness and Severe Obesity  
37  
38  
39  
40

41 **\*Corresponding author** Shijian Liu, 1678 Dongfang Road, Pediatric Translational Medicine  
42 Institute, Shanghai Children's Medical Center, Shanghai Jiaotong University School of Medicine,  
43 Shanghai, China, 200127, Tel and Fax: 86-21-38625637  
44  
45 E-mail: liushijian@scmc.com.cn  
46  
47

48 **Co-corresponding author** Hong Huang, 1665 Kongjiang Road, Shanghai Key Laboratory of  
49 Children's Environmental Health, Xinhua Hospital, Shanghai Jiaotong University School of  
50 Medicine, Shanghai, China, 200092  
51  
52 E-mail: Huanghong@smhb.gov.cn  
53  
54  
55  
56  
57  
58  
59  
60

## ABSTRACT

**Objectives** Low birthweight (BW) is a general symbol of inadequate intrauterine conditions that elicit abnormal fetal growth and development. The aim of current study is to investigate the relationship between low BW and thinness or severe obesity during maturation.

**Design** A large-scale cross-sectional population-based survey.

**Setting** 134 kindergartens and 70 elementary schools.

**Participants** 70,284 Chinese children aged 3-12 years.

**Outcome measures** International Obesity Task Force BMI cut-offs were used to define grade 1, 2, 3 thinness, overweight, obesity and severe obesity. Multinomial logistic regression was used to estimate the association between birthweight and BMI category.

**Results** Total 70,284 children participated in the survey. The percentage of grade 1 thinness and severe obesity in children with low birthweight is significantly higher than that with normal birthweight ( $P < 0.05$ ). Low BW associated with an increased risk of grade 1 thinness (OR = 1.56, 95%CI = 1.38–1.75), grade 2 thinness (OR = 1.34, 95%CI = 1.10–1.64), grade 3 thinness (OR = 1.99, 95%CI = 1.63–2.42) and severe obesity (OR = 1.27, 95%CI = 1.03–1.55) but did not associate with obesity (OR = 0.85, 95%CI = 0.67–1.06).

**Conclusion** The relationship between low BW and thinness or severe obesity risk is associated.

### Strengths and limitations of this study

- This study is a large population-based cross-sectional survey, with a representative, multistage proportional cluster sampling.
- Low birthweight was found to be associated with an increased risk of grade 1 thinness, grade 2 thinness, grade 3 thinness and severe obesity, rather than overweight or obesity.
- Height/weight and birthweight was collected by self-reported questionnaires in a cross-sectional study.

## INTRODUCTION

Childhood obesity is one of the most serious global public health challenges.<sup>1</sup> Furthermore, obesity in childhood may lead to short-term morbidity and to subsequent adverse consequences across the individual's lifespan and his or her subsequent generation.<sup>1</sup> Growing evidence indicates that perinatal characteristics have been recognized as contributing factors to the obesity epidemic.<sup>2</sup> Birthweight (BW) is frequently used as an indicator of the conditions experienced in utero which contribute to the newborn baby's survival, health, growth, and development.<sup>3 4</sup> Lower BW is a general symbol of inadequate intrauterine conditions that elicit abnormal fetal growth and development.<sup>5</sup> Based on the findings of numerous studies, low BW (birthweight < 2500g) has been shown to trigger various short-term and long-term health issues, especially for birth injuries, delayed motor development, delayed cognitive and social skills, obesity and chronic diseases.<sup>4 6</sup>

A great number of studies have indicated that high BW is associated with an increased risk of childhood obesity.<sup>6-9</sup> Nevertheless, the conclusions drawn by studies evaluating the associations between low BW and obesity appear to be controversial. Some studies suggest that low BW correlates with a significantly elevated risk for obesity.<sup>10 11</sup> while some other studies contradict this result, reporting that low BW is unrelated to or protective against overweight and/or obesity.<sup>6 12 13</sup> However, these studies only assess the effect of BW on childhood overweight or obesity but ignored childhood thinness.

Because of the absence of evidence regarding the relationship between BW and thinness and the inconsistent conclusions regarding the relationship of BW and overweight or obesity, in our large population-based observational study, we aimed to examine the relationship between BW and the risk of obesity and placed extra emphasis on the effect of thinness in 3–12-year-old children from 7 districts of Shanghai.

## METHODS

### Study design and quality control

Our study was a school-based cross-sectional population study and was part of a governmental population survey of autism spectrum disorders. Multistage, stratified clustered random sampling was conducted in 3 to 12-year-old children in Shanghai, China and related baseline data was

1  
2 collected from 134 kindergartens and 70 elementary schools in June 2014. Details of the sample  
3 size, sampling and quality control process have been described previously.<sup>14 15</sup> The 17 districts of  
4 Shanghai were stratified into eight urban districts in the central area and nine suburban areas,  
5 according to the geographical and social population distributions; people living in urban and  
6 suburban districts were defined as urban and suburban residents. EpiData 3.1 (EpiData Association,  
7 Odense, Denmark) was used for data inputting and a logical error check was applied. We also  
8 repeated data entry by randomly sampling 15% of the questionnaires to ensure consistency. The  
9 study was approved by the Institutional Review Boards of the Shanghai Municipal Commission of  
10 Health and Family Planning.

## 11 **Measurements**

12 We used growth questionnaires for collecting information about children's families and social  
13 environments. Teachers distributed questionnaires to students, asked students to take the  
14 questionnaire home and have their parents fill in the information, then the teachers collected the  
15 completed questionnaires and returned them to the investigator. Parents provided the following  
16 information about their children: age, sex, weight, height, birthweight, education level, and so on  
17 by self-report. Participants with complete birthweight, weight and height data constituted the final  
18 sample. BMI was calculated as weight divided by the square of height ( $\text{kg}/\text{m}^2$ ) and classified as  
19 grade 3 thinness, grade 2 thinness, grade 1 thinness, overweight, obesity and severe obesity,  
20 according to the International Obesity Task Force age- and sex-specific cut-off points, of which  
21 BMI cut-offs equal to 16.0, 17.0, 18.5, 25.0, 30.0 and 35.0  $\text{kg}/\text{m}^2$  at age 18 years, respectively.<sup>16</sup>

22 Birthweight, was divided into low BW group (neonates weighing  $< 2500$  g at birth, irrespective  
23 of gestational age), normal BW group (neonates weighing: 2500–4000 g at birth, irrespective of  
24 gestational age) and high BW group (neonates weighing  $\geq 4000$ g at birth, irrespective of gestational  
25 age).

26 Neonatal characteristics including gestational weeks ( $< 37$  weeks, 37–42 weeks and  $\geq 42$  weeks),  
27 normal delivery (yes or no), single-child family (yes or no), maternal history of abortion (yes or no),  
28 asphyxia (lack of oxygen at birth, yes or no), and infant feeding patterns (breast feeding exclusively,  
29 formula feeding exclusively, mixed feeding) were considered as potential prenatal confounding  
30 factors.<sup>6 17</sup> Moreover, parental socioeconomic characteristics were considered as follows: family

1  
2 income was divided into three categories (low: < 50,000 Chinese Yuan per year; middle:  
3 50,000–200,000 Chinese Yuan per year; high: ≥ 200,000 Chinese Yuan per year) according to the  
4 definitions of social science,<sup>18</sup> parental education (low: illiterate, primary school and junior school;  
5 middle: high school, technical school and college; high: undergraduate, master and doctor), and  
6 residence location (urban districts: Yangpu, Xuhui, and Jing'an; suburban districts: Minhang,  
7 Pudong, Fengxian and Chongming).  
8  
9  
10  
11  
12  
13  
14

## 15 **Statistical analysis**

16  
17  
18 Continuous variables were presented as the mean with standard deviations (SD) and a Student's  
19 *t*-test was carried out for group comparisons. Categorical variables were presented as absolute  
20 numbers with relative frequencies (%). The linear-by-linear trend test were performed to detect the  
21 distribution of different BMI categories between low and normal BW and inter-subgroup  
22 differences were examined using Pearson Chi-square ( $\chi^2$ ) test. Multinomial logistic regression was  
23 used to estimate the relationship between BW and the risk of childhood thinness and obesity with  
24 normal weight as a reference group. Model 1 adjusted for the basic characteristics, age and gender,  
25 which were all influence factors of BMI category. Also, neonatal characteristics were reported to  
26 be associated with both birthweight and BMI category, thus were adjusted as a confounder in  
27 model 2. Socioeconomic characteristics could reflect the environment and nutritional status to  
28 some extent and were further adjusted in model 3. All confounding variables enter into the  
29 multinomial regression model. Odds ratio (OR) and 95% confident interval (CI) were obtained by  
30 using the multiple models. All statistical analyses were performed with IBM SPSS Statistics  
31 Version 22 (SPSS, Chicago, IL, USA). The criterion for statistical significance was 0.05 by  
32 two-tailed.  
33  
34  
35  
36  
37  
38  
39  
40  
41  
42  
43  
44  
45  
46  
47  
48

## 49 **Patient and Public Involvement**

50  
51 Parents were informed about question and data of survey before filling in the questionnaires, they  
52 didn't involve the design, recruitment and conduct of the study, the results will be disseminated to  
53 participants as required.  
54  
55  
56  
57  
58  
59  
60

## RESULTS

In total, 84,075 questionnaires were distributed and 81,384 completed questionnaires were returned with a response rate of 96.80%. Complete data regarding weight, height, and BW were available for 70,284 children. 3,359 children were born with low BW and 59,356 children were born with normal BW. 32,629 boys (52.03%) and 30,086 girls (47.97%) aged 3 to 12 years. Sex-specific variables such as growth (age, BMI category, and BW), neonatal characteristics (pregnancy term, breast-feeding, normal delivery, children number, abortion and asphyxia) and parental socioeconomic characteristics (residence, family income and parental education) were described in detail in **Table 1**.

The distribution of different BMI categories between low and normal BW was examined by linear-by-linear trend test and the chi-square tests value was 36.98 ( $P < 0.001$ ). Detailed information was shown in **Figure 1**. For boys, the respective percentage of grade 3 thinness (3.64%, 95%CI 3.55-3.73%, vs. 2.23%, 95%CI 2.21-2.25%,  $P < 0.05$ ), grade 2 thinness (3.64%, 95%CI 3.55-3.73%, vs. 2.83%, 95%CI 2.81-2.85%,  $P < 0.05$ ), grade 1 thinness (12.95%, 95%CI 12.79-13.11%, vs. 9.00%, 95%CI 8.97-9.03%,  $P < 0.05$ ) were higher in the low BW group than those in the normal BW group; in contrast, the respective percentage of overweight (14.00%, 95%CI 13.83-14.17%, vs. 16.34%, 95%CI 16.30-16.38%,  $P > 0.05$ ), obesity (4.75%, 95%CI 4.65-4.85%, vs. 5.22% 95%CI 5.20-5.24%,  $P > 0.05$ ) were not statistically significant but severe obesity (5.86%, 95%CI 5.75-5.97%, vs. 4.36%, 95%CI 4.34-4.38%,  $P < 0.05$ ) was higher in low BW group compared with normal group ( $P < 0.05$ ). Meanwhile, the percentage of severe obesity and grade 3 thinness were relatively higher in low BW group compared with the normal BW group ( $P < 0.05$ ), which shows a U-shape. The pattern is similar in girls; the percentage of grade 3 thinness (5.81%, 95%CI 5.70-5.92% vs. 2.77% 95%CI 2.75-2.79%,  $P < 0.05$ ), grade 2 thinness (4.78%, 95%CI 4.68-4.88% vs. 3.70%, 95%CI 3.68-3.72%,  $P < 0.05$ ), grade 1 thinness (14.85%, 95%CI 14.68-15.02% vs. 11.67%, 95%CI 11.63-11.71%,  $P < 0.05$ ) were higher but severe obesity (4.66%, 95%CI 4.56-4.76% vs. 3.35%, 95%CI 3.33-3.37,  $P < 0.05$ ) were lower in low BW group. However, overweight (8.92%, 95%CI 8.79-9.05%, vs. 11.17%, 95%CI 11.13-11.21%,  $P < 0.05$ ) and obesity (2.82%, 95%CI 2.74-2.90%, vs. 2.71%, 95%CI 2.69-2.73,  $P > 0.05$ ) showed no statistical difference between the groups.



1  
2  
3  
4  
5  
6  
7  
8  
9  
10  
11  
12  
13  
14  
15  
16  
17  
18  
19  
20  
21  
22  
23  
24  
25  
26  
27  
28  
29  
30  
31  
32  
33  
34  
35  
36  
37  
38  
39  
40  
41  
42  
43  
44  
45  
46  
47  
48  
49  
50  
51  
52  
53  
54  
55  
56  
57  
58  
59  
60

Multinomial logistic regression was used to further determine the relationship between BW and thinness, overweight and obesity after adjusting for potential confounders. As is shown in **Table 2**, an initial analysis was performed in model 1 adjusting for only age and gender variables. The results showed that low BW is significantly associated with a higher risk for both thinness (grade 3 thinness: OR = 2.16, 95%CI = 1.82–2.56; grade 2 thinness: OR = 1.43, 95%CI = 1.20–1.70; grade 1 thinness: OR = 1.49, 95%CI = 1.34–1.65) and severe obesity (OR = 1.62, 95%CI: 1.38–1.90), but did not associate with overweight (OR = 0.89, 95%CI = 0.80–1.00) or obesity (OR = 1.05, 95%CI = 0.87–1.26). In addition, model 2 is further adjusted for neonatal characteristics based on model 1 and model 3 characterized by additional adjustments for socioeconomic variables based on model 2. Still, low BW children are more likely to have grade 1 thinness (OR = 1.56, 95%CI = 1.38–1.75), grade 2 thinness (OR = 1.34, 95%CI = 1.10–1.64) and especially grade 3 thinness (OR = 1.99, 95%CI = 1.63–2.42); the pattern is consistent in the three models. The low BW remained to be statistically significant predictors of severe obesity (OR = 1.27, 95%CI = 1.03–1.55), but not associated with obesity (OR = 0.85, 95%CI = 0.67–1.06).

## DISCUSSION

In the present study, we reported a bidirectional effect of low BW, increasing the risk of grade 3 thinness and severe obesity.

Some studies have assessed the relationship between low BW and the risk of childhood obesity, but the results were controversial.<sup>6 19-23</sup> In a systematic review and meta-analysis involving eleven studies, pooled estimates for low BW (< 2500g) revealed no association with obesity (pooled OR = 0.87, 95%CI = 0.69–1.08) using normal BW (2500–4000 g) as the reference category.<sup>6</sup> Another systematic review and meta-analysis of 30 studies found that low BW was associated with a reduced risk of childhood obesity (pooled OR = 0.67, 95%CI = 0.59–0.76).<sup>19</sup> With regard to long-term risk of overweight and obesity, two previous papers have suggested a positive association with low BW, including a population-based cross-sectional survey among Chinese adults (obesity: OR = 1.99, 95%CI = 1.15–3.43),<sup>11</sup> and an observational study among older women in Sweden (obesity: OR = 1.14, 95%CI = 1.03–1.26).<sup>10</sup> On the contrary, a large full-range BW study reported that children with a BW less than 2,500 g were protected against overweight or

1  
2 obesity from 6 months to 3 years of life, but this association disappeared among boys at 2 years of  
3 age.<sup>21</sup> Our study highlighted the association between low BW and increased risk of severe obesity  
4 rather than overweight or obesity among the Chinese children aged between 3 and 12 years. An  
5 age-specific effect of low BW on obesity might address some of the primary reasons why previous  
6 studies have drawn contrasting conclusions. In a Swedish cohort with 285 marginally low BW  
7 (2000-2500g) and 95 normal birthweight children, no increased risk of overweight or obesity was  
8 observed by up to 7 years (BMI 0.47 kg/m<sup>2</sup> (95% CI 0.17-0.76) lower compared with controls).<sup>24</sup>  
9 Another possible explanation might be the potential of growth have not been fully developed  
10 among those low birthweight children. Not all low birthweight children undergo catch-up growth,  
11 and different growth pattern might exist. Special attention should be paid among those low  
12 birthweight children in future cohort study.  
13  
14

15  
16 It was difficult to explain the particular pattern between grade 1, 2 and 3 thinness, and various  
17 BW groups. In a follow up study in 2 rural Shaanxi counties of Northwest China, low BW was not  
18 related with boys' obesity or thinness rates (adjusted OR = 2.91, 95% CI= 0.95–8.93) but  
19 significantly correlated with increased risk of thinness among girls (adjusted OR = 4.41, 95% CI =  
20 1.77–10.97).<sup>25</sup> Our study confirmed the association and further demonstrated that low BW is  
21 associated with an increased risk of subsequent grade 3 thinness, followed by grade 1 thinness, and  
22 then grade 2 thinness after adjusting for confounding variables. On the other hand, high BW  
23 exerted a protective effect on grade 2 thinness, followed by grade 1 thinness, then grade 3 thinness.  
24 Most notably, low BW was a risk factor for grade 3 thinness as well as severe obesity. We  
25 hypothesized that the relationship between BW and thinness, overweight or obesity risk was not  
26 directly linear, whereas the relationship between low BW and BMI was U-shaped. Low BW was an  
27 adverse perinatal environment factor which predicts changes to the central regulatory mechanism  
28 linked with negative influences on metabolism and BMI.<sup>26</sup> Thus, children with low BW  
29 accompanied by poor childhood weight outcomes should receive more public health attention.  
30  
31  
32  
33  
34  
35  
36  
37  
38  
39  
40  
41  
42  
43  
44  
45  
46  
47  
48  
49  
50  
51  
52

53  
54 Several studies have indicated that abnormal BW was an important risk factor for metabolic  
55 disease occurrence, especially for hypertension, type 2 diabetes, abdominal obesity and other  
56 chronic diseases later in life,<sup>11 27-29</sup> A proposed explanation for the relationship between BW and  
57 postnatal growth was through the concept of 'Developmental Origins of Health and Disease',  
58  
59  
60

1  
2 which stated that environmental cues during critical periods of life lead to predictive adaptive  
3 responses that shaped tissue development and metabolic pathways, thereby permanently affecting  
4 long-term health and disease risk.<sup>30</sup> Our epidemiological observations might have implications for  
5 understanding intrauterine environmental influences during early development and the relationship  
6 of BW with later risk of thinness and obesity.  
7  
8  
9  
10  
11  
12

### 13 **Strengths and Limitations**

14  
15 Our study recruited children from low- to high-income families across seven districts of the  
16 Shanghai area by a large, representative, multistage proportional cluster sampling. We were able to  
17 assess the relationship between low BW and risk of childhood thinness, obesity or severe obesity  
18 using a large sample size (n = 70,284) of children with low BW (4.61%). What's more, we  
19 provided a comprehensive profile of the distribution of overall BMI status including grade 1, grade  
20 2, grade 3 thinness, normal weight, overweight, obesity and severe obesity in low and normal BW  
21 groups. As for the potential confounding variables associated in the multinomial logistic regression,  
22 we took a broad range of predictors into consideration, from prenatal to postnatal.  
23  
24  
25  
26  
27  
28  
29  
30  
31

32 However, there were several limitations in our study. First, the cross-sectional nature precluded  
33 us from making cause-and-effect inferences and observing continuous age-effects and long-term  
34 effects. Because etiology of thinness and obesity could not be drawn, cohort studies are still needed  
35 to track growth trajectory of low birthweight children. Second, the information, including height  
36 and weight was collected by questionnaires because of the large sample size, and there was  
37 underlying bias of self-reported data. Also, misunderstandings of the questions on neonatal  
38 outcome is another underlying risk. In addition, the BW records might have been wrongly recalled  
39 by the parents or guardian, thus the degree and direction of potential bias in the results was  
40 unknown. Our results suggest a need for carefully designed longitudinal studies with precise  
41 physical examination and indicators to document thinness and obesity among low birthweight  
42 children.  
43  
44  
45  
46  
47  
48  
49  
50  
51  
52  
53

### 54 **CONCLUSIONS**

55  
56 In summary, low BW was positively associated with an increased risk of thinness and severe  
57 obesity but not associated with obesity. We call for special attention for children with abnormal  
58  
59  
60

1  
2 BW for healthier physical development during growth, and their mothers by creating a favorable  
3 environment with recommendation on physical activity and nutrition and limitation of their alcohol  
4 and tobacco consumption to lower the risk of low BW. We hope the pattern of thinness and obesity  
5 in different BW groups may provide valuable insights to direct healthcare policies for improving  
6 outcomes and quality in later life.  
7  
8  
9  
10  
11  
12

13 **Contributors** ZJ, YY, FJ, HH and XJ helped perform the study. XJ and SL designed the research; CC drafted the  
14 manuscript and performed statistical analyses; SL and HH contributed to the interpretation of results and  
15 critically reviewed the manuscript; SL had primary responsibility for final content. All authors read and approved  
16 the final manuscript and declared no conflict of interest. We are grateful to all parents and teachers of the children  
17 for their assistance and cooperation in this study.  
18  
19  
20  
21  
22  
23

24 **Competing interests** The authors declare no conflict of interest.  
25

26 **Ethics approval** This study was conducted according to the guidelines in the World Medical Association (2000)  
27 Declaration of Helsinki: Ethical Principles for Medical Research Involving Human Subjects  
28 (<http://www.wma.net/en/30publications/10policies/b3/>) and the Guidelines for the Ethical Conduct of Medical  
29 Research Involving Children, revised in 2000 by the Royal College of Paediatrics and Child Health: Ethics  
30 Advisory Committee (Arch Dis Child 2000, 82, 177–182). All procedures involving human subjects were  
31 approved by the Institutional Review Boards of the Shanghai Municipal Commission of Health and Family  
32 Planning. Verbal informed consent was obtained from all participants, and witnessed and formally recorded.  
33 Parents were given notification and information about the survey at the beginning of the questionnaire, it is  
34 difficult to get written consent in large scale population-based cross-sectional study in China.  
35  
36  
37  
38  
39  
40  
41  
42  
43  
44

45 **Funding** The present study was supported by the Shanghai Municipal Commission of Health and Family  
46 Planning: Shanghai Municipal Enhancing Public Health 3-year Program (2011–2013) (11PH1951202), National  
47 Science Foundation of China [81872637,81728017,81602868], Shanghai Municipal Commission of Health and  
48 Family Planning[201840324,20164Y0095]; Project of Shanghai Collaborative Innovation Center for  
49 Translational Medicine [TM201720], Program of National Science and Technology Commission for association  
50 of diabetes and nutrition in adolescent [2016YFC1305203], Medical and Engineering Cooperation Project of  
51 Shanghai Jiao Tong University [YG2017ZD15],The Project of Shanghai Children’s Health Service Capacity  
52 Construction [GDEK201708], National Human Genetic Resources Sharing Service Platform [2005DKA21300],  
53  
54  
55  
56  
57  
58  
59  
60

1  
2 Science and Technology Development Program of Pudong Shanghai New District [PKJ2017-Y01], Science  
3  
4 Innovation Funding of Shanghai Jiaotong University School of Medicine [Z2016-02], and Shanghai Professional  
5  
6 and Technical Services Platform [18DZ2294100].  
7

8 **Data sharing statement** All data relevant to the study are included in the article.  
9  
10  
11  
12  
13  
14  
15  
16  
17  
18  
19  
20  
21  
22  
23  
24  
25  
26  
27  
28  
29  
30  
31  
32  
33  
34  
35  
36  
37  
38  
39  
40  
41  
42  
43  
44  
45  
46  
47  
48  
49  
50  
51  
52  
53  
54  
55  
56  
57  
58  
59  
60

For peer review only

## REFERENCES

1. WHO. Facts and figures on childhood obesity <http://www.who.int/end-childhood-obesity/facts/en/>: *World Health Organization (WHO)*
2. Cunningham SA, Kramer MR, Narayan KM. Incidence of childhood obesity in the United States. *N Engl J Med* 2014;370(17):1660-1.
3. Fallucca S, Vasta M, Sciallo E, et al. Birth weight: genetic and intrauterine environment in normal pregnancy. *Diabetes Care* 2009;32(12):e149.
4. Mohammad K, Kassab M, Gamble J, et al. Factors associated with birth weight inequalities in Jordan. *Int Nurs Rev* 2014;61(3):435-40.
5. Labayen I, Moreno LA, Ruiz JR, et al. Small birth weight and later body composition and fat distribution in adolescents: the Avena study. *Obesity* 2008;16(7):1680-6.
6. Yu ZB, Han SP, Zhu GZ, et al. Birth weight and subsequent risk of obesity: a systematic review and meta-analysis. *Obes Rev* 2011;12(7):525-42.
7. Ye R, Pei L, Ren A, et al. Birth weight, maternal body mass index, and early childhood growth: a prospective birth cohort study in China. *J Epidemiol* 2010;20(6):421-8.
8. Weng SF, Redsell SA, Swift JA, et al. Systematic review and meta-analyses of risk factors for childhood overweight identifiable during infancy. *Arch Dis Child* 2012;97(12):1019-26.
9. Kapral N, Miller SE, Scharf RJ, et al. Associations between birthweight and overweight and obesity in school-age children. *Pediatric Obesity* 2017
10. Newby PK, Dickman PW, Adami HO, et al. Early anthropometric measures and reproductive factors as predictors of body mass index and obesity among older women. *Int J Obes* 2005;29(9):1084-92.
11. Tian JY, Cheng Q, Song XM, et al. Birth weight and risk of type 2 diabetes, abdominal obesity and hypertension among Chinese adults. *Eur J Endocrinol* 2006;155(4):601-7.
12. Gomes FM, Subramanian SV, Escobar AM, et al. No association between low birth weight and cardiovascular risk factors in early adulthood: evidence from Sao Paulo, Brazil. *PloS One* 2013;8(6):e66554.

- 1  
2  
3  
4 13. Lindberg J, Norman M, Westrup B, et al. Overweight, Obesity, and Body Composition in  
5 3.5- and 7-Year-Old Swedish Children Born with Marginally Low Birth Weight. *J*  
6 *Pediatr* 2015;167(6):1246-52 e3.  
7
- 8  
9  
10 14. Chen C, Jin Z, Yang Y, et al. Prevalence of grade 1, 2 and 3 thinness is associated with  
11 lower socio-economic status in children in Shanghai, China. *Public Health Nutr*  
12 2016;19(11):2002-10.  
13
- 14  
15 15. Jin Z, Yang Y, Liu S, et al. Prevalence of DSM-5 Autism Spectrum Disorder Among  
16 School-Based Children Aged 3-12 Years in Shanghai, China. *J Autism Dev Disord.*  
17 2018;48(7):2434-43.  
18
- 19  
20 16. Cole TJ, Lobstein T. Extended international (IOTF) body mass index cut-offs for  
21 thinness, overweight and obesity. *Pediatr Obes* 2012;7(4):284-94.  
22
- 23  
24 17. Qiao Y, Ma J, Wang Y, et al. Birth weight and childhood obesity: a 12-country study. *Int*  
25 *J Obes Suppl* 2015;5(Suppl 2):S74-9.  
26
- 27  
28 18. Ye T. Middle Income and Middle Income Group in Shanghai. *J Social Sciences*  
29 2006(9):91-100.  
30
- 31  
32 19. Schellong K, Schulz S, Harder T, et al. Birth weight and long-term overweight risk:  
33 systematic review and a meta-analysis including 643,902 persons from 66 studies and 26  
34 countries globally. *PloS One* 2012;7(10):e47776.  
35
- 36  
37 20. Zhang X, Liu E, Tian Z, et al. High birth weight and overweight or obesity among  
38 Chinese children 3-6 years old. *Prev Med* 2009;49(2-3):172-8.  
39
- 40  
41 21. Li N, Liu E, Sun S, et al. Birth weight and overweight or obesity risk in children under 3  
42 years in China. *Am J Hum Biol* 2014;26(3):331-6.  
43
- 44  
45 22. Loaiza S, Coustasse A, Urrutia-Rojas X, et al. Birth weight and obesity risk at first grade  
46 in a cohort of Chilean children. *Nutr Hosp* 2011;26(1):214-9.  
47
- 48  
49 23. Dubois L, Girard M. Early determinants of overweight at 4.5 years in a population-based  
50 longitudinal study. *Int J Obes (Lond)* 2006;30(4):610-7.  
51
- 52  
53 24. Pei L, Kang Y, Zhao Y, et al. Changes in Socioeconomic Inequality of Low Birth Weight  
54 and Macrosomia in Shaanxi Province of Northwest China, 2010-2013: A Cross-sectional  
55  
56  
57  
58  
59  
60

- 1  
2  
3  
4 Study. *Medicine (Baltimore)* 2016;95(5):e2471.  
5  
6 25. Zhou J, Zeng L, Dang S, et al. Maternal Prenatal Nutrition and Birth Outcomes on  
7  
8 Malnutrition among 7- to 10-Year-Old Children: A 10-Year Follow-Up. *J Pediatr* 2016  
9  
10 26. Wang G, Johnson S, Gong Y, et al. Weight Gain in Infancy and Overweight or Obesity  
11  
12 in Childhood across the Gestational Spectrum: a Prospective Birth Cohort Study.  
13  
14 *Scientific reports* 2016;6:29867.  
15  
16 27. Eriksson JG. Early growth and adult health outcomes--lessons learned from the Helsinki  
17  
18 Birth Cohort Study. *Matern Child Nutr* 2005;1(3):149-54.  
19  
20 28. Chen W, Srinivasan SR, Yao L, et al. Low birth weight is associated with higher blood  
21  
22 pressure variability from childhood to young adulthood: the Bogalusa Heart Study. *Am J*  
23  
24 *Epidemiol* 2012;176 Suppl 7:S99-105.  
25  
26 29. Abitbol CL, Moxey-Mims M. Chronic kidney disease: Low birth weight and the global  
27  
28 burden of kidney disease. *Nat Rev Nephrol* 2016;12(4):199-200.  
29  
30 30. Hanson MA, Gluckman PD. Early developmental conditioning of later health and disease:  
31  
32 physiology or pathophysiology? *Physiol Rev* 2014;94(4):1027-76.  
33  
34  
35  
36  
37  
38  
39  
40  
41  
42  
43  
44  
45  
46  
47  
48  
49  
50  
51  
52  
53  
54  
55  
56  
57  
58  
59  
60



| <b>Table 1</b> Characteristics of the study participants |        |              |              |             |                  |
|----------------------------------------------------------|--------|--------------|--------------|-------------|------------------|
| Variables                                                | Number | Boys N (%)   | Girls N (%)  | $\chi^2$    | <i>P</i> value   |
| Number                                                   | 62715  | 32629 (52.0) | 30086 (48.0) |             |                  |
| <b>Age (year)</b>                                        |        |              |              | <b>2.76</b> | <b>0.948</b>     |
| 3-                                                       | 2006   | 1023(3.1)    | 983(3.3)     |             |                  |
| 4-                                                       | 8186   | 4250(13.0)   | 3936(13.1)   |             |                  |
| 5-                                                       | 8481   | 4434(13.6)   | 4047(13.5)   |             |                  |
| 6-                                                       | 8237   | 4286(13.1)   | 3951(13.3)   |             |                  |
| 7-                                                       | 8133   | 4260(13.1)   | 3873(12.9)   |             |                  |
| 8-                                                       | 8540   | 4431(13.6)   | 4109(13.7)   |             |                  |
| 9-                                                       | 7494   | 3876(11.9)   | 3618(12.0)   |             |                  |
| 10-                                                      | 6477   | 3402(10.4)   | 3075(10.2)   |             |                  |
| 11-                                                      | 5161   | 2667(8.2)    | 2494(8.3)    |             |                  |
| Body Mass Index Category                                 |        |              |              | 803.87      | <b>&lt;0.001</b> |
| Grade 3 Thinness                                         | 1637   | 752(2.3)     | 885(2.9)     |             |                  |
| Grade 2 Thinness                                         | 2071   | 938(2.9)     | 1133(3.8)    |             |                  |
| Grade 1 Thinness                                         | 6568   | 3001(9.2)    | 3567(11.9)   |             |                  |
| Normal                                                   | 38831  | 19502(59.8)  | 19329(64.3)  |             |                  |
| Overweight                                               | 8614   | 5292(16.2)   | 3322(11.0)   |             |                  |
| Obesity                                                  | 2514   | 1696(5.2)    | 818(2.7)     |             |                  |
| Severe obesity                                           | 2480   | 1448(4.4)    | 1032(3.4)    |             |                  |
| Birthweight Category (g)                                 |        |              |              | 19.88       | <b>&lt;0.001</b> |
| <2500                                                    | 3359   | 1622 (5.0)   | 1737 (5.8)   |             |                  |
| 2500-4000                                                | 59356  | 31007 (95.0) | 28349 (94.2) |             |                  |
| Neonatal Characteristics                                 |        |              |              |             |                  |
| Pregnancy Term (Weeks)                                   |        |              |              | 19.22       | <b>&lt;0.001</b> |
| <37                                                      | 3854   | 2135(6.5)    | 1719(5.7)    |             |                  |

|                                       |       |             |             |              |                  |
|---------------------------------------|-------|-------------|-------------|--------------|------------------|
| 37-42                                 | 56238 | 29106(89.2) | 27132(90.2) |              |                  |
| ≥42                                   | 2035  | 1063(3.3)   | 972(3.2)    |              |                  |
| Missing                               | 588   | 325(1.0)    | 263(0.9)    |              |                  |
| <b>Feeding Patterns (&lt;4 Month)</b> |       |             |             | <b>4.59</b>  | <b>0.101</b>     |
| Breast Feeding                        | 30716 | 15925(48.8) | 14791(49.2) |              |                  |
| Formula Feeding                       | 9959  | 5119(15.7)  | 4840(16.1)  |              |                  |
| Mixed Feeding                         | 21612 | 11363(34.8) | 10249(34.1) |              |                  |
| Missing                               | 428   | 222(0.7)    | 206(0.7)    |              |                  |
| <b>Normal Delivery</b>                |       |             |             | <b>1.23</b>  | <b>0.267</b>     |
| Yes                                   | 30054 | 15563(47.7) | 14491(48.2) |              |                  |
| No                                    | 32226 | 16831(51.6) | 15395(51.2) |              |                  |
| Missing                               | 435   | 235(0.7)    | 200(0.7)    |              |                  |
| <b>One-Child Family</b>               |       |             |             | <b>34.94</b> | <b>&lt;0.001</b> |
| Yes                                   | 43207 | 22748(69.7) | 20459(68.0) |              |                  |
| No                                    | 15665 | 7816(24.0)  | 7849(21.6)  |              |                  |
| Missing                               | 3843  | 2065(6.3)   | 1778(5.9)   |              |                  |
| <b>Abortion</b>                       |       |             |             | <b>3.16</b>  | <b>0.076</b>     |
| Yes                                   | 14849 | 7818(24.0)  | 7031(23.4)  |              |                  |
| No                                    | 47401 | 24561(75.3) | 22840(75.9) |              |                  |
| Missing                               | 465   | 250(0.8)    | 215(0.7)    |              |                  |
| <b>Asphyxia</b>                       |       |             |             | <b>45.15</b> | <b>&lt;0.001</b> |
| Yes                                   | 2146  | 1269(3.9)   | 877(2.9)    |              |                  |
| No                                    | 59732 | 30916(94.8) | 28816(95.8) |              |                  |
| Missing                               | 837   | 444(1.4)    | 393(1.3)    |              |                  |
| <b>Socioeconomic Characteristics</b>  |       |             |             |              |                  |
| <b>Area</b>                           |       |             |             | <b>3.20</b>  | <b>0.074</b>     |
| Suburban                              | 49231 | 25709(78.8) | 23522(78.2) |              |                  |

1  
2  
3  
4  
5  
6  
7  
8  
9  
10  
11  
12  
13  
14  
15  
16  
17  
18  
19  
20  
21  
22  
23  
24  
25  
26  
27  
28  
29  
30  
31  
32  
33  
34  
35  
36  
37  
38  
39  
40  
41  
42  
43  
44  
45  
46

|                                 |       |             |             |              |                  |
|---------------------------------|-------|-------------|-------------|--------------|------------------|
| Urban                           | 13371 | 6866(21.0)  | 6505(21.6)  |              |                  |
| Missing                         | 113   | 54(0.2)     | 59(0.2)     |              |                  |
| <b>Income</b>                   |       |             |             | <b>4.92</b>  | <b>0.086</b>     |
| Low                             | 16762 | 8811(27.0)  | 7951(26.4)  |              |                  |
| Middle                          | 34442 | 17898(54.9) | 16544(55.0) |              |                  |
| High                            | 10279 | 5261(16.1)  | 5018(16.7)  |              |                  |
| Missing                         | 1232  | 659(2.0)    | 573(1.9)    |              |                  |
| <b>Mother's Education Level</b> |       |             |             | <b>48.07</b> | <b>&lt;0.001</b> |
| Low                             | 17541 | 9485(29.1)  | 8056(26.8)  |              |                  |
| Middle                          | 24365 | 12435(38.1) | 11930(39.7) |              |                  |
| High                            | 16972 | 8629(26.4)  | 8343(27.7)  |              |                  |
| Missing                         | 3837  | 2080(6.4)   | 1757(5.8)   |              |                  |
| <b>Father's Education Level</b> |       |             |             | <b>33.79</b> | <b>&lt;0.001</b> |
| Low                             | 15357 | 8280(25.4)  | 7077(23.5)  |              |                  |
| Middle                          | 24305 | 12467(38.2) | 11838(39.3) |              |                  |
| High                            | 19196 | 9805(30.0)  | 9391(31.2)  |              |                  |
| Missing                         | 3857  | 2077(6.4)   | 1780(5.9)   |              |                  |

BMI, body mass index.

only

**Table 2.** Association between low birthweight and thinness, overweight, obesity, severe obesity by multinomial logistic regression models.

|         | N      | Grade 3 Thinness   | Grade 2 Thinness   | Grade 1 Thinness   | Overweight         | Obesity            | Severe Obesity     |
|---------|--------|--------------------|--------------------|--------------------|--------------------|--------------------|--------------------|
| Model 1 | 62,715 | 2.16 (1.82 - 2.56) | 1.43 (1.20 - 1.70) | 1.49 (1.34 - 1.65) | 0.89 (0.80 - 1.00) | 1.05 (0.87 - 1.26) | 1.62 (1.38 - 1.90) |
| Model 2 | 56,909 | 2.12 (1.74 - 2.59) | 1.35 (1.10 - 1.65) | 1.52 (1.35 - 1.72) | 0.88 (0.77 - 1.00) | 1.00 (0.81 - 1.25) | 1.43 (1.18 - 1.75) |
| Model 3 | 55,600 | 1.99 (1.63 - 2.42) | 1.34 (1.10 - 1.64) | 1.56 (1.38 - 1.75) | 0.87 (0.76 - 0.99) | 0.85 (0.67 - 1.06) | 1.27 (1.03 - 1.55) |

OR: odds ratio; CI: confidence interval;

Normal BMI as the reference group.

\* *P* value <0.05.

Model 1: adjusted for age and gender;

Model 2: adjusted for age, gender and neonatal characteristics (pregnant term, feeding pattern, delivery mode, one child, abortion and asphyxia);

Model 3: adjusted for age, gender, neonatal characteristics (pregnant term, feeding pattern, delivery mode, one child, abortion and asphyxia) and socioeconomic characteristics (urbanicity, parental education and family income);

## Figure Legend

**Figure 1** Percentage of thinness, overweight, obesity and severe obesity between low and normal birthweight

\* Statistically significant difference between low and normal BW in boys ( $\chi^2$  test,  $P < 0.05$ );

# Statistically significant difference between low and normal BW in girls ( $\chi^2$  test,  $P < 0.05$ ).

For peer review only

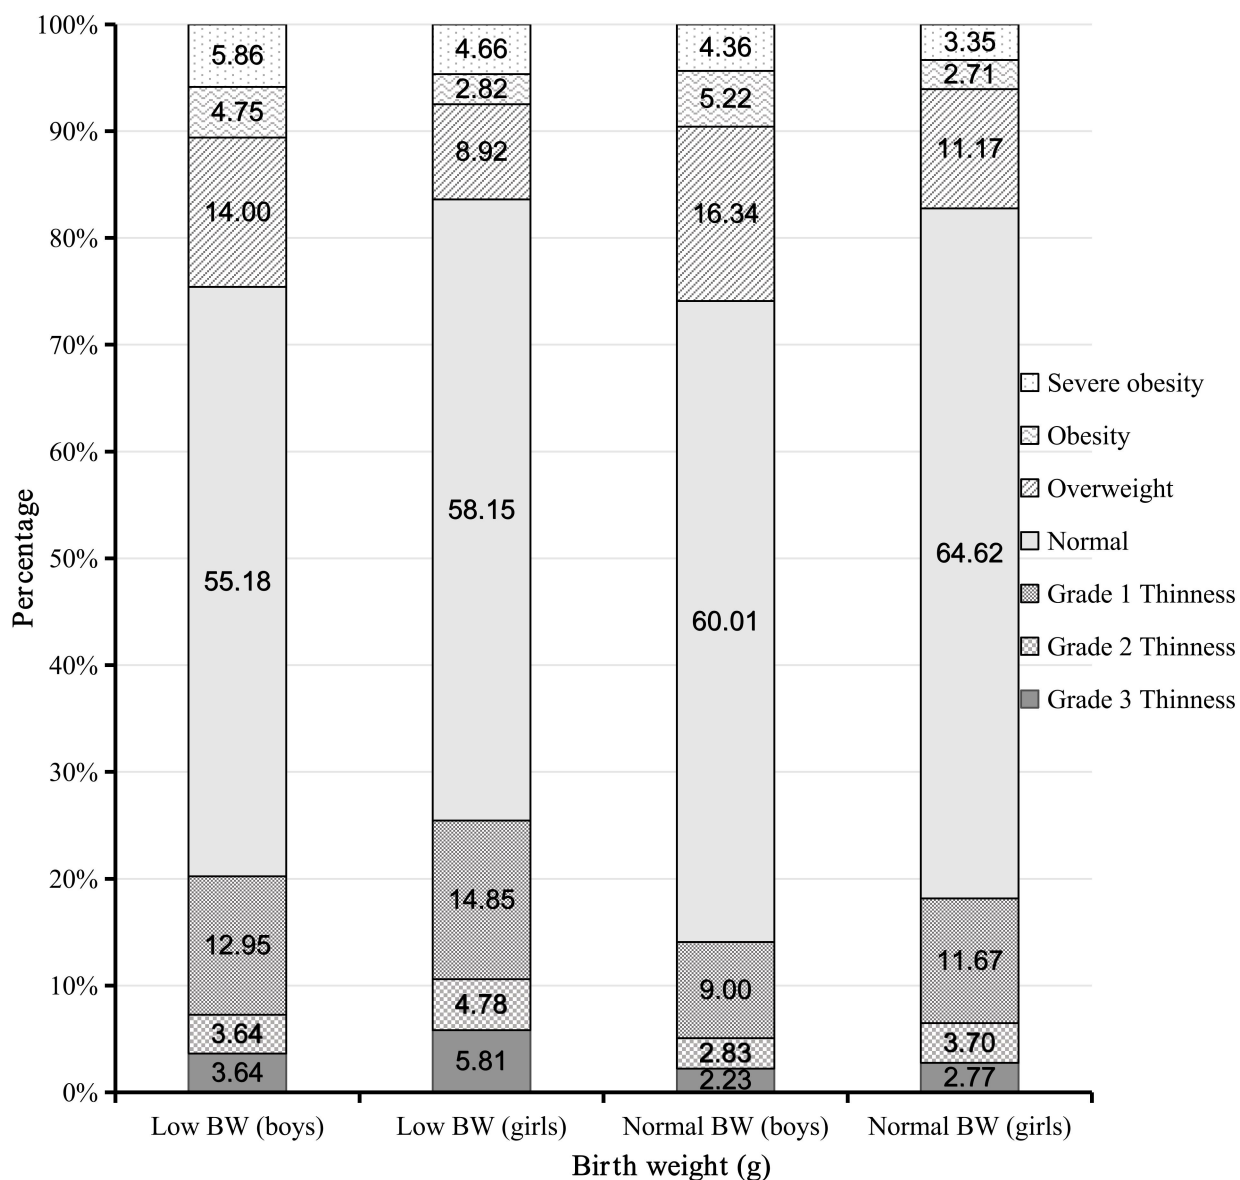

**Figure 1** Percentage of thinness, overweight, obesity and severe obesity between low and normal birthweight

**STROBE 2007 (v4) Statement—Checklist of items that should be included in reports of *cross-sectional studies***

| Section/Topic                | Item # | Recommendation                                                                                                                                                                       | Reported on page # |
|------------------------------|--------|--------------------------------------------------------------------------------------------------------------------------------------------------------------------------------------|--------------------|
| <b>Title and abstract</b>    | 1      | (a) Indicate the study's design with a commonly used term in the title or the abstract                                                                                               | 2                  |
|                              |        | (b) Provide in the abstract an informative and balanced summary of what was done and what was found                                                                                  | 2                  |
| <b>Introduction</b>          |        |                                                                                                                                                                                      |                    |
| Background/rationale         | 2      | Explain the scientific background and rationale for the investigation being reported                                                                                                 | 3                  |
| Objectives                   | 3      | State specific objectives, including any prespecified hypotheses                                                                                                                     | 3                  |
| <b>Methods</b>               |        |                                                                                                                                                                                      | -                  |
| Study design                 | 4      | Present key elements of study design early in the paper                                                                                                                              | 3, 4               |
| Setting                      | 5      | Describe the setting, locations, and relevant dates, including periods of recruitment, exposure, follow-up, and data collection                                                      | 4                  |
| Participants                 | 6      | (a) Give the eligibility criteria, and the sources and methods of selection of participants                                                                                          | 4                  |
| Variables                    | 7      | Clearly define all outcomes, exposures, predictors, potential confounders, and effect modifiers. Give diagnostic criteria, if applicable                                             | 4,5                |
| Data sources/<br>measurement | 8*     | For each variable of interest, give sources of data and details of methods of assessment (measurement). Describe comparability of assessment methods if there is more than one group | 4,5                |
| Bias                         | 9      | Describe any efforts to address potential sources of bias                                                                                                                            |                    |
| Study size                   | 10     | Explain how the study size was arrived at                                                                                                                                            | 4                  |
| Quantitative variables       | 11     | Explain how quantitative variables were handled in the analyses. If applicable, describe which groupings were chosen and why                                                         | 4,5                |
| Statistical methods          | 12     | (a) Describe all statistical methods, including those used to control for confounding                                                                                                | 5                  |
|                              |        | (b) Describe any methods used to examine subgroups and interactions                                                                                                                  | 5                  |
|                              |        | (c) Explain how missing data were addressed                                                                                                                                          | 5                  |
|                              |        | (d) If applicable, describe analytical methods taking account of sampling strategy                                                                                                   | -                  |
|                              |        | (e) Describe any sensitivity analyses                                                                                                                                                | -                  |
| <b>Results</b>               |        |                                                                                                                                                                                      |                    |

|                          |     |                                                                                                                                                                                                              |                 |
|--------------------------|-----|--------------------------------------------------------------------------------------------------------------------------------------------------------------------------------------------------------------|-----------------|
| Participants             | 13* | (a) Report numbers of individuals at each stage of study—eg numbers potentially eligible, examined for eligibility, confirmed eligible, included in the study, completing follow-up, and analysed            | 5, 6            |
|                          |     | (b) Give reasons for non-participation at each stage                                                                                                                                                         | 5               |
|                          |     | (c) Consider use of a flow diagram                                                                                                                                                                           | -               |
| Descriptive data         | 14* | (a) Give characteristics of study participants (eg demographic, clinical, social) and information on exposures and potential confounders                                                                     | 5,6,13,14,15    |
|                          |     | (b) Indicate number of participants with missing data for each variable of interest                                                                                                                          | 5,6,13,14,15    |
| Outcome data             | 15* | Report numbers of outcome events or summary measures                                                                                                                                                         | 5,6,13,14,15    |
| Main results             | 16  | (a) Give unadjusted estimates and, if applicable, confounder-adjusted estimates and their precision (eg, 95% confidence interval). Make clear which confounders were adjusted for and why they were included | 5,6,13,14,15,16 |
|                          |     | (b) Report category boundaries when continuous variables were categorized                                                                                                                                    | 5,6,13,14,15,16 |
|                          |     | (c) If relevant, consider translating estimates of relative risk into absolute risk for a meaningful time period                                                                                             | 5,6,13,14,15    |
| Other analyses           | 17  | Report other analyses done—eg analyses of subgroups and interactions, and sensitivity analyses                                                                                                               | 5, 6            |
| <b>Discussion</b>        |     |                                                                                                                                                                                                              |                 |
| Key results              | 18  | Summarise key results with reference to study objectives                                                                                                                                                     | 7               |
| Limitations              | 19  | Discuss limitations of the study, taking into account sources of potential bias or imprecision. Discuss both direction and magnitude of any potential bias                                                   | 8,9             |
| Interpretation           | 20  | Give a cautious overall interpretation of results considering objectives, limitations, multiplicity of analyses, results from similar studies, and other relevant evidence                                   | 7,8             |
| Generalisability         | 21  | Discuss the generalisability (external validity) of the study results                                                                                                                                        | 7,8,9           |
| <b>Other information</b> |     |                                                                                                                                                                                                              |                 |
| Funding                  | 22  | Give the source of funding and the role of the funders for the present study and, if applicable, for the original study on which the present article is based                                                | 10              |

\*Give information separately for cases and controls in case-control studies and, if applicable, for exposed and unexposed groups in cohort and cross-sectional studies.

**Note:** An Explanation and Elaboration article discusses each checklist item and gives methodological background and published examples of transparent reporting. The STROBE checklist is best used in conjunction with this article (freely available on the Web sites of PLoS Medicine at <http://www.plosmedicine.org/>, Annals of Internal Medicine at <http://www.annals.org/>, and Epidemiology at <http://www.epidem.com/>). Information on the STROBE Initiative is available at [www.strobe-statement.org](http://www.strobe-statement.org).
